# Supplementary material for: Representing true plant genomes: haplotype-resolved hybrid pepper genome with trio-binning
Source: Front Plant Sci. 2023 Nov 16;14:1184112. doi: 10.3389/fpls.2023.1184112 (PMC10687446; doi:10.3389/fpls.2023.1184112)
Supplement: Supplementary Data Sheet 1 — Genotyping data from parental samples on the PepperSNP16K array. [file DataSheet_1.xlsx]

## Sheet: prime
marker	USDA-HDA149	USDA-HDA330
UC_Pep_Genomic_102523	R	R
UC_Pep_Genomic_1221103	R	R
UC_Pep_Genomic_1438225	K	K
UC_Pep_Genomic_1579590	K	K
UC_Pep_Genomic_194851	Y	Y
UC_Pep_Genomic_1973542	Y	Y
UC_Pep_Genomic_2020824	M	M
UC_Pep_Genomic_2943980	R	R
UC_Pep_Genomic_3803758	R	R
UC_Pep_Genomic_4349394	M	M
UC_Pep_Genomic_6411652	Y	Y
UC_Pep_Genomic_6691825	R	R
UC_Pep_Genomic_6693111	R	R
UC_Pep_Genomic_7214147	R	R
UC_Pep_Genomic_7433015	R	R
UC_Pep_Genomic_7445731	Y	Y
UC_Pep_Genomic_7519464	K	K
UC_Pep_Genomic_7552504	R	R
UC_Pep_Genomic_3888878	Y	T
UC_Pep_Genomic_543870	K	T
UC_Pep_Genomic_7592121	Y	T
UC_Pep_Genomic_7733260	Y	T
UC_Pep_Genomic_841025	K	T
UC_Pep_Genomic_995772	K	T
UC_Pep_Genomic_058230	M	C
UC_Pep_Genomic_1144899	R	G
UC_Pep_Genomic_1953003	Y	C
UC_Pep_Genomic_1953588	R	A
UC_Pep_Genomic_420901	R	G
UC_Pep_Genomic_4834045	R	G
UC_Pep_Genomic_5058616	R	A
UC_Pep_Genomic_5109819	R	A
UC_Pep_Genomic_5113114	Y	C
UC_Pep_Genomic_5623329	R	G
UC_Pep_Genomic_7100419	R	A
UC_Pep_Genomic_7100420	Y	C
UC_Pep_Genomic_7125169	R	failed
UC_Pep_Genomic_7143288	K	failed
UC_Pep_Genomic_7187760	M	C
UC_Pep_Genomic_7258230	Y	C
UC_Pep_Genomic_7299629	R	G
UC_Pep_Genomic_7418134	R	G
UC_Pep_Genomic_7612037	Y	C
UC_Pep_Genomic_7749586	R	G
UC_Pep_Genomic_7807956	R	G
UC_Pep_Genomic_7851598	Y	C
UC_Pep_Genomic_7855073	K	G
UC_Pep_Genomic_7855076	R	A
UC_Pep_Genomic_7855080	R	G
UC_Pep_Genomic_996288	A	G
UC_Pep_Genomic_1144466	G	K
UC_Pep_Genomic_1154366	A	R
UC_Pep_Genomic_1183972	C	M
UC_Pep_Genomic_1225691	T	K
UC_Pep_Genomic_1253106	failed	M
UC_Pep_Genomic_142617	failed	K
UC_Pep_Genomic_1536165	C	M
UC_Pep_Genomic_1652692	T	Y
UC_Pep_Genomic_1674973	A	R
UC_Pep_Genomic_1775449	failed	R
UC_Pep_Genomic_1877363	T	Y
UC_Pep_Genomic_1967162	A	M
UC_Pep_Genomic_1968464	failed	K
UC_Pep_Genomic_2012916	T	K
UC_Pep_Genomic_2510769	failed	M
UC_Pep_Genomic_2856173	C	M
UC_Pep_Genomic_3008591	G	R
UC_Pep_Genomic_3857599	G	R
UC_Pep_Genomic_3904937	A	R
UC_Pep_Genomic_3991864	G	R
UC_Pep_Genomic_4714072	C	Y
UC_Pep_Genomic_492824	C	M
UC_Pep_Genomic_5116512	G	K
UC_Pep_Genomic_5128576	A	M
UC_Pep_Genomic_5477856	C	Y
UC_Pep_Genomic_5564983	C	Y
UC_Pep_Genomic_5585321	T	Y
UC_Pep_Genomic_5593876	G	R
UC_Pep_Genomic_5645537	C	Y
UC_Pep_Genomic_6649846	G	K
UC_Pep_Genomic_6685643	C	M
UC_Pep_Genomic_6801812	C	Y
UC_Pep_Genomic_7092673	T	Y
UC_Pep_Genomic_7099978	A	R
UC_Pep_Genomic_7190007	A	R
UC_Pep_Genomic_7195945	T	Y
UC_Pep_Genomic_7201188	C	M
UC_Pep_Genomic_7241431	G	K
UC_Pep_Genomic_7296203	G	K
UC_Pep_Genomic_7334315	G	R
UC_Pep_Genomic_7379278	A	M
UC_Pep_Genomic_7381938	A	R
UC_Pep_Genomic_7488716	T	K
UC_Pep_Genomic_7497797	C	M
UC_Pep_Genomic_7519473	failed	Y
UC_Pep_Genomic_7526807	failed	R
UC_Pep_Genomic_7592838	G	R
UC_Pep_Genomic_7765207	C	M
UC_Pep_Genomic_7781501	failed	R
UC_Pep_Genomic_7848561	A	R
UC_Pep_Genomic_7848567	G	R
UC_Pep_Genomic_7849020	C	M
UC_Pep_Genomic_7870078	T	K
UC_Pep_Genomic_7891557	C	Y
UC_Pep_Genomic_802508	T	K
UC_Pep_Genomic_852302	failed	Y
UC_Pep_Genomic_857365	G	R
UC_Pep_Genomic_976743	A	R
UC_Pep_Genomic_000186	C	T
UC_Pep_Genomic_001090	C	T
UC_Pep_Genomic_001510	C	T
UC_Pep_Genomic_001516	C	T
UC_Pep_Genomic_002487	T	T
UC_Pep_Genomic_002618	T	T
UC_Pep_Genomic_002631	T	T
UC_Pep_Genomic_002662	C	T
UC_Pep_Genomic_003669	C	T
UC_Pep_Genomic_004318	G	T
UC_Pep_Genomic_004447	C	T
UC_Pep_Genomic_004451	T	T
UC_Pep_Genomic_004549	C	T
UC_Pep_Genomic_004575	T	T
UC_Pep_Genomic_004672	T	T
UC_Pep_Genomic_004851	C	T
UC_Pep_Genomic_005606	T	T
UC_Pep_Genomic_005709	C	T
UC_Pep_Genomic_005756	T	T
UC_Pep_Genomic_005805	C	T
UC_Pep_Genomic_007295	T	T
UC_Pep_Genomic_008041	T	T
UC_Pep_Genomic_008759	C	T
UC_Pep_Genomic_008846	G	T
UC_Pep_Genomic_009110	T	T
UC_Pep_Genomic_010394	T	T
UC_Pep_Genomic_011952	T	T
UC_Pep_Genomic_016142	C	T
UC_Pep_Genomic_017212	T	T
UC_Pep_Genomic_017715	T	T
UC_Pep_Genomic_017747	C	T
UC_Pep_Genomic_017948	C	T
UC_Pep_Genomic_018292	T	T
UC_Pep_Genomic_018575	C	T
UC_Pep_Genomic_018612	C	T
UC_Pep_Genomic_019383	T	T
UC_Pep_Genomic_019512	T	T
UC_Pep_Genomic_019513	G	T
UC_Pep_Genomic_021744	T	T
UC_Pep_Genomic_023905	C	T
UC_Pep_Genomic_024289	T	T
UC_Pep_Genomic_025346	G	T
UC_Pep_Genomic_025659	G	T
UC_Pep_Genomic_026265	T	T
UC_Pep_Genomic_027638	T	T
UC_Pep_Genomic_027836	T	T
UC_Pep_Genomic_028024	T	T
UC_Pep_Genomic_028029	T	T
UC_Pep_Genomic_028672	T	T
UC_Pep_Genomic_028673	T	T
UC_Pep_Genomic_028804	T	T
UC_Pep_Genomic_028817	T	T
UC_Pep_Genomic_029169	T	T
UC_Pep_Genomic_030091	G	T
UC_Pep_Genomic_030875	T	T
UC_Pep_Genomic_031128	T	T
UC_Pep_Genomic_033961	C	T
UC_Pep_Genomic_034095	C	T
UC_Pep_Genomic_035362	C	T
UC_Pep_Genomic_035741	C	T
UC_Pep_Genomic_038709	T	T
UC_Pep_Genomic_040782	C	T
UC_Pep_Genomic_042238	T	T
UC_Pep_Genomic_042323	T	T
UC_Pep_Genomic_043054	G	T
UC_Pep_Genomic_044233	T	T
UC_Pep_Genomic_045044	T	T
UC_Pep_Genomic_045250	T	T
UC_Pep_Genomic_045290	T	T
UC_Pep_Genomic_045338	C	T
UC_Pep_Genomic_045355	T	T
UC_Pep_Genomic_045387	T	T
UC_Pep_Genomic_055936	T	T
UC_Pep_Genomic_061394	T	T
UC_Pep_Genomic_064873	T	T
UC_Pep_Genomic_069657	C	T
UC_Pep_Genomic_069752	C	T
UC_Pep_Genomic_069777	T	T
UC_Pep_Genomic_078048	T	T
UC_Pep_Genomic_078853	T	T
UC_Pep_Genomic_079318	T	T
UC_Pep_Genomic_079389	T	T
UC_Pep_Genomic_080746	C	T
UC_Pep_Genomic_088273	T	T
UC_Pep_Genomic_090103	C	T
UC_Pep_Genomic_090107	G	T
UC_Pep_Genomic_092997	T	T
UC_Pep_Genomic_093169	T	T
UC_Pep_Genomic_093902	C	T
UC_Pep_Genomic_097000	T	T
UC_Pep_Genomic_097018	T	T
UC_Pep_Genomic_097196	T	T
UC_Pep_Genomic_097364	T	T
UC_Pep_Genomic_097427	T	T
UC_Pep_Genomic_097692	T	T
UC_Pep_Genomic_097833	T	T
UC_Pep_Genomic_098122	G	T
UC_Pep_Genomic_098123	C	T
UC_Pep_Genomic_099507	C	T
UC_Pep_Genomic_100523	T	T
UC_Pep_Genomic_1006651	T	T
UC_Pep_Genomic_1020386	T	T
UC_Pep_Genomic_1023026	T	T
UC_Pep_Genomic_1026130	T	T
UC_Pep_Genomic_1029811	T	T
UC_Pep_Genomic_103247	T	T
UC_Pep_Genomic_103469	T	T
UC_Pep_Genomic_1038033	G	T
UC_Pep_Genomic_1038041	T	T
UC_Pep_Genomic_104648	T	T
UC_Pep_Genomic_1049050	T	T
UC_Pep_Genomic_1051431	G	T
UC_Pep_Genomic_1051730	T	T
UC_Pep_Genomic_105538	G	T
UC_Pep_Genomic_1061167	C	T
UC_Pep_Genomic_1061761	T	T
UC_Pep_Genomic_1063825	G	T
UC_Pep_Genomic_1069071	T	T
UC_Pep_Genomic_1070100	C	T
UC_Pep_Genomic_1070766	C	T
UC_Pep_Genomic_1071932	T	T
UC_Pep_Genomic_1074120	C	T
UC_Pep_Genomic_1075717	G	T
UC_Pep_Genomic_1078170	T	T
UC_Pep_Genomic_1078810	T	T
UC_Pep_Genomic_1080061	T	T
UC_Pep_Genomic_1080195	T	T
UC_Pep_Genomic_1080206	T	T
UC_Pep_Genomic_1080354	T	T
UC_Pep_Genomic_1081367	T	T
UC_Pep_Genomic_1082049	C	T
UC_Pep_Genomic_1082942	T	T
UC_Pep_Genomic_1083776	T	T
UC_Pep_Genomic_1084383	C	T
UC_Pep_Genomic_1084400	T	T
UC_Pep_Genomic_1085933	C	T
UC_Pep_Genomic_1087503	G	T
UC_Pep_Genomic_1088698	C	T
UC_Pep_Genomic_1090018	T	T
UC_Pep_Genomic_1092555	C	T
UC_Pep_Genomic_1093126	C	T
UC_Pep_Genomic_1093973	C	T
UC_Pep_Genomic_1096720	T	T
UC_Pep_Genomic_1102674	T	T
UC_Pep_Genomic_1102943	C	T
UC_Pep_Genomic_1106140	T	T
UC_Pep_Genomic_1106717	T	T
UC_Pep_Genomic_1114479	C	T
UC_Pep_Genomic_1115732	T	T
UC_Pep_Genomic_1116919	T	T
UC_Pep_Genomic_1117234	T	T
UC_Pep_Genomic_1117303	T	T
UC_Pep_Genomic_1118160	T	T
UC_Pep_Genomic_1118345	T	T
UC_Pep_Genomic_1119134	T	T
UC_Pep_Genomic_1119358	T	T
UC_Pep_Genomic_1119545	T	T
UC_Pep_Genomic_1119943	T	T
UC_Pep_Genomic_1120145	C	T
UC_Pep_Genomic_1120274	G	T
UC_Pep_Genomic_1122802	C	T
UC_Pep_Genomic_1122829	C	T
UC_Pep_Genomic_1123937	T	T
UC_Pep_Genomic_1124722	C	T
UC_Pep_Genomic_1125009	C	T
UC_Pep_Genomic_1125087	T	T
UC_Pep_Genomic_1125275	T	T
UC_Pep_Genomic_1125445	T	T
UC_Pep_Genomic_1125509	T	T
UC_Pep_Genomic_1126519	C	T
UC_Pep_Genomic_1126523	C	T
UC_Pep_Genomic_1127084	T	T
UC_Pep_Genomic_1127265	T	T
UC_Pep_Genomic_1127852	C	T
UC_Pep_Genomic_1127999	C	T
UC_Pep_Genomic_1128553	T	T
UC_Pep_Genomic_1131789	C	T
UC_Pep_Genomic_1133200	T	T
UC_Pep_Genomic_1133671	T	T
UC_Pep_Genomic_1134352	T	T
UC_Pep_Genomic_1134694	C	T
UC_Pep_Genomic_1134703	C	T
UC_Pep_Genomic_1134778	C	T
UC_Pep_Genomic_1136059	C	T
UC_Pep_Genomic_1136184	T	T
UC_Pep_Genomic_1136475	T	T
UC_Pep_Genomic_1136824	G	T
UC_Pep_Genomic_1138485	T	T
UC_Pep_Genomic_1138497	T	T
UC_Pep_Genomic_1140372	T	T
UC_Pep_Genomic_1142105	C	T
UC_Pep_Genomic_1142607	C	T
UC_Pep_Genomic_1142960	C	T
UC_Pep_Genomic_1143224	T	T
UC_Pep_Genomic_1143269	T	T
UC_Pep_Genomic_1143610	T	T
UC_Pep_Genomic_1144476	C	T
UC_Pep_Genomic_1144739	G	T
UC_Pep_Genomic_1145002	T	T
UC_Pep_Genomic_1145042	T	T
UC_Pep_Genomic_1145224	G	T
UC_Pep_Genomic_1145226	G	T
UC_Pep_Genomic_1145376	C	T
UC_Pep_Genomic_1145564	G	T
UC_Pep_Genomic_1145572	C	T
UC_Pep_Genomic_1145770	failed	T
UC_Pep_Genomic_1145914	T	T
UC_Pep_Genomic_1145928	T	T
UC_Pep_Genomic_1146377	T	T
UC_Pep_Genomic_1146512	C	T
UC_Pep_Genomic_1146546	C	T
UC_Pep_Genomic_1146696	C	T
UC_Pep_Genomic_1146764	T	T
UC_Pep_Genomic_1146804	C	T
UC_Pep_Genomic_1146931	C	T
UC_Pep_Genomic_1147066	C	T
UC_Pep_Genomic_1147201	C	T
UC_Pep_Genomic_1147731	C	T
UC_Pep_Genomic_1147953	C	T
UC_Pep_Genomic_1148023	T	T
UC_Pep_Genomic_1148259	C	T
UC_Pep_Genomic_1148662	T	T
UC_Pep_Genomic_1150330	C	T
UC_Pep_Genomic_1151165	G	T
UC_Pep_Genomic_1151676	T	T
UC_Pep_Genomic_1151881	G	T
UC_Pep_Genomic_1152019	T	T
UC_Pep_Genomic_1154231	T	T
UC_Pep_Genomic_1154367	C	T
UC_Pep_Genomic_1155998	T	T
UC_Pep_Genomic_1156224	T	T
UC_Pep_Genomic_1156255	T	T
UC_Pep_Genomic_1156747	T	T
UC_Pep_Genomic_1157440	C	T
UC_Pep_Genomic_1157442	T	T
UC_Pep_Genomic_1157581	T	T
UC_Pep_Genomic_1157635	T	T
UC_Pep_Genomic_1157762	T	T
UC_Pep_Genomic_1158373	T	T
UC_Pep_Genomic_1158435	C	T
UC_Pep_Genomic_1158987	T	T
UC_Pep_Genomic_1159324	C	T
UC_Pep_Genomic_1159381	C	T
UC_Pep_Genomic_1159655	T	T
UC_Pep_Genomic_1159701	T	T
UC_Pep_Genomic_1159720	T	T
UC_Pep_Genomic_1160033	T	T
UC_Pep_Genomic_1160205	T	T
UC_Pep_Genomic_1160301	T	T
UC_Pep_Genomic_1160418	T	T
UC_Pep_Genomic_1160755	T	T
UC_Pep_Genomic_1160859	T	T
UC_Pep_Genomic_116112	C	T
UC_Pep_Genomic_1161290	T	T
UC_Pep_Genomic_1161291	T	T
UC_Pep_Genomic_1162973	T	T
UC_Pep_Genomic_1163140	T	T
UC_Pep_Genomic_1163185	T	T
UC_Pep_Genomic_1163485	T	T
UC_Pep_Genomic_1163648	T	T
UC_Pep_Genomic_1163701	C	T
UC_Pep_Genomic_1164507	T	T
UC_Pep_Genomic_1164542	T	T
UC_Pep_Genomic_1164952	C	T
UC_Pep_Genomic_1165414	C	T
UC_Pep_Genomic_116559	T	T
UC_Pep_Genomic_1166263	T	T
UC_Pep_Genomic_1166705	T	T
UC_Pep_Genomic_1167286	G	T
UC_Pep_Genomic_116771	T	T
UC_Pep_Genomic_1167990	C	T
UC_Pep_Genomic_1168130	G	T
UC_Pep_Genomic_1168417	C	T
UC_Pep_Genomic_116845	G	T
UC_Pep_Genomic_1168955	G	T
UC_Pep_Genomic_1169318	T	T
UC_Pep_Genomic_1169371	C	T
UC_Pep_Genomic_1169571	T	T
UC_Pep_Genomic_1169673	T	T
UC_Pep_Genomic_1169706	T	T
UC_Pep_Genomic_1169799	T	T
UC_Pep_Genomic_1169887	T	T
UC_Pep_Genomic_1170344	T	T
UC_Pep_Genomic_1170347	C	T
UC_Pep_Genomic_1170387	T	T
UC_Pep_Genomic_1170592	T	T
UC_Pep_Genomic_1170614	T	T
UC_Pep_Genomic_1170848	T	T
UC_Pep_Genomic_1171111	C	T
UC_Pep_Genomic_1171149	T	T
UC_Pep_Genomic_1171340	C	T
UC_Pep_Genomic_1172040	T	T
UC_Pep_Genomic_1172688	G	T
UC_Pep_Genomic_1172795	T	T
UC_Pep_Genomic_1172807	T	T
UC_Pep_Genomic_1172943	T	T
UC_Pep_Genomic_1173118	T	T
UC_Pep_Genomic_1173413	C	T
UC_Pep_Genomic_1173499	T	T
UC_Pep_Genomic_1173739	G	T
UC_Pep_Genomic_1173757	T	T
UC_Pep_Genomic_1173822	T	T
UC_Pep_Genomic_1174573	T	T
UC_Pep_Genomic_1174618	G	T
UC_Pep_Genomic_1174637	T	T
UC_Pep_Genomic_1174664	C	T
UC_Pep_Genomic_1174837	C	T
UC_Pep_Genomic_1174877	C	T
UC_Pep_Genomic_1175236	C	T
UC_Pep_Genomic_1175356	T	T
UC_Pep_Genomic_1175835	G	T
UC_Pep_Genomic_1175978	G	T
UC_Pep_Genomic_1176022	C	T
UC_Pep_Genomic_1176216	C	T
UC_Pep_Genomic_1176232	T	T
UC_Pep_Genomic_1176332	T	T
UC_Pep_Genomic_1176413	C	T
UC_Pep_Genomic_1176492	C	T
UC_Pep_Genomic_1176561	T	T
UC_Pep_Genomic_117700	T	T
UC_Pep_Genomic_1177656	T	T
UC_Pep_Genomic_1178964	T	T
UC_Pep_Genomic_1181648	T	T
UC_Pep_Genomic_1181894	T	T
UC_Pep_Genomic_1181947	T	T
UC_Pep_Genomic_1181983	T	T
UC_Pep_Genomic_1181991	T	T
UC_Pep_Genomic_1182215	T	T
UC_Pep_Genomic_1182288	T	T
UC_Pep_Genomic_1182649	T	T
UC_Pep_Genomic_1182785	G	T
UC_Pep_Genomic_1182965	T	T
UC_Pep_Genomic_118314	C	T
UC_Pep_Genomic_1183340	T	T
UC_Pep_Genomic_1184121	T	T
UC_Pep_Genomic_1184732	T	T
UC_Pep_Genomic_1185417	T	T
UC_Pep_Genomic_1185419	T	T
UC_Pep_Genomic_1185926	T	T
UC_Pep_Genomic_1186292	T	T
UC_Pep_Genomic_1187130	T	T
UC_Pep_Genomic_1188696	T	T
UC_Pep_Genomic_1190722	T	T
UC_Pep_Genomic_1190777	T	T
UC_Pep_Genomic_1191791	T	T
UC_Pep_Genomic_1191800	T	T
UC_Pep_Genomic_1191804	T	T
UC_Pep_Genomic_1191840	T	T
UC_Pep_Genomic_1192836	T	T
UC_Pep_Genomic_1193772	T	T
UC_Pep_Genomic_1194595	T	T
UC_Pep_Genomic_1195079	T	T
UC_Pep_Genomic_1195540	T	T
UC_Pep_Genomic_1195830	T	T
UC_Pep_Genomic_1196069	T	T
UC_Pep_Genomic_1198500	T	T
UC_Pep_Genomic_1198559	T	T
UC_Pep_Genomic_1198728	T	T
UC_Pep_Genomic_1198733	T	T
UC_Pep_Genomic_1199211	T	T
UC_Pep_Genomic_1200414	T	T
UC_Pep_Genomic_1202487	T	T
UC_Pep_Genomic_1205869	T	T
UC_Pep_Genomic_1206583	T	T
UC_Pep_Genomic_1206584	T	T
UC_Pep_Genomic_1207276	T	T
UC_Pep_Genomic_1207349	T	T
UC_Pep_Genomic_1208483	T	T
UC_Pep_Genomic_1209205	T	T
UC_Pep_Genomic_1209348	T	T
UC_Pep_Genomic_1210916	T	T
UC_Pep_Genomic_1217347	T	T
UC_Pep_Genomic_1221268	T	T
UC_Pep_Genomic_1222520	T	T
UC_Pep_Genomic_1222626	T	T
UC_Pep_Genomic_1222964	T	T
UC_Pep_Genomic_1223438	T	T
UC_Pep_Genomic_1224734	T	T
UC_Pep_Genomic_1224819	T	T
UC_Pep_Genomic_1225372	T	T
UC_Pep_Genomic_1225487	T	T
UC_Pep_Genomic_1227432	T	T
UC_Pep_Genomic_1228546	T	T
UC_Pep_Genomic_1230863	T	T
UC_Pep_Genomic_1231807	T	T
UC_Pep_Genomic_1233372	T	T
UC_Pep_Genomic_1234152	T	T
UC_Pep_Genomic_1234205	T	T
UC_Pep_Genomic_1234301	T	T
UC_Pep_Genomic_1237892	T	T
UC_Pep_Genomic_1237944	C	T
UC_Pep_Genomic_1238290	T	T
UC_Pep_Genomic_1238551	T	T
UC_Pep_Genomic_1239749	T	T
UC_Pep_Genomic_1240917	T	T
UC_Pep_Genomic_1242536	T	T
UC_Pep_Genomic_1243094	T	T
UC_Pep_Genomic_1243157	T	T
UC_Pep_Genomic_1243827	T	T
UC_Pep_Genomic_1243969	T	T
UC_Pep_Genomic_1244599	T	T
UC_Pep_Genomic_1246153	T	T
UC_Pep_Genomic_1250785	T	T
UC_Pep_Genomic_1251817	T	T
UC_Pep_Genomic_1256060	T	T
UC_Pep_Genomic_1257745	T	T
UC_Pep_Genomic_1259657	T	T
UC_Pep_Genomic_1259869	T	T
UC_Pep_Genomic_1262583	T	T
UC_Pep_Genomic_1263891	T	T
UC_Pep_Genomic_126548	G	T
UC_Pep_Genomic_1267001	T	T
UC_Pep_Genomic_1269526	T	T
UC_Pep_Genomic_1270695	T	T
UC_Pep_Genomic_127305	C	T
UC_Pep_Genomic_1273405	T	T
UC_Pep_Genomic_1275717	T	T
UC_Pep_Genomic_1280758	T	T
UC_Pep_Genomic_1283329	T	T
UC_Pep_Genomic_128408	T	T
UC_Pep_Genomic_1285823	T	T
UC_Pep_Genomic_1292585	T	T
UC_Pep_Genomic_1292620	T	T
UC_Pep_Genomic_129978	T	T
UC_Pep_Genomic_1303858	T	T
UC_Pep_Genomic_1303862	T	T
UC_Pep_Genomic_1304494	T	T
UC_Pep_Genomic_1304767	T	T
UC_Pep_Genomic_1331212	T	T
UC_Pep_Genomic_1333656	T	T
UC_Pep_Genomic_1336446	T	T
UC_Pep_Genomic_1336477	T	T
UC_Pep_Genomic_1343113	T	T
UC_Pep_Genomic_1343199	T	T
UC_Pep_Genomic_1344460	T	T
UC_Pep_Genomic_135582	G	T
UC_Pep_Genomic_1364583	T	T
UC_Pep_Genomic_1365803	T	T
UC_Pep_Genomic_1378366	T	T
UC_Pep_Genomic_1382252	T	T
UC_Pep_Genomic_1382268	T	T
UC_Pep_Genomic_1386770	T	T
UC_Pep_Genomic_1386775	T	T
UC_Pep_Genomic_1386789	T	T
UC_Pep_Genomic_1412819	T	T
UC_Pep_Genomic_1415829	T	T
UC_Pep_Genomic_1415840	T	T
UC_Pep_Genomic_1431753	T	T
UC_Pep_Genomic_1438893	T	T
UC_Pep_Genomic_1450179	T	T
UC_Pep_Genomic_1452573	T	T
UC_Pep_Genomic_1455157	T	T
UC_Pep_Genomic_1455190	T	T
UC_Pep_Genomic_1455662	T	T
UC_Pep_Genomic_1458652	T	T
UC_Pep_Genomic_1462162	T	T
UC_Pep_Genomic_146790	T	T
UC_Pep_Genomic_1469798	T	T
UC_Pep_Genomic_147243	T	T
UC_Pep_Genomic_1475259	T	T
UC_Pep_Genomic_1475727	T	T
UC_Pep_Genomic_1476635	T	T
UC_Pep_Genomic_1477765	T	T
UC_Pep_Genomic_1481145	T	T
UC_Pep_Genomic_1481146	T	T
UC_Pep_Genomic_1482676	T	T
UC_Pep_Genomic_1485548	T	T
UC_Pep_Genomic_1495503	T	T
UC_Pep_Genomic_1496143	T	T
UC_Pep_Genomic_1505368	T	T
UC_Pep_Genomic_1510968	T	T
UC_Pep_Genomic_1515516	T	T
UC_Pep_Genomic_1516406	T	T
UC_Pep_Genomic_1519915	T	T
UC_Pep_Genomic_1520046	T	T
UC_Pep_Genomic_1521652	T	T
UC_Pep_Genomic_1526482	T	T
UC_Pep_Genomic_1529589	T	T
UC_Pep_Genomic_1529950	T	T
UC_Pep_Genomic_1533497	T	T
UC_Pep_Genomic_1535878	T	T
UC_Pep_Genomic_1536116	T	T
UC_Pep_Genomic_1537276	T	T
UC_Pep_Genomic_153788	T	T
UC_Pep_Genomic_153810	T	T
UC_Pep_Genomic_1539512	T	T
UC_Pep_Genomic_1539762	T	T
UC_Pep_Genomic_1540389	T	T
UC_Pep_Genomic_1543140	T	T
UC_Pep_Genomic_1543741	T	T
UC_Pep_Genomic_1544546	T	T
UC_Pep_Genomic_1551444	T	T
UC_Pep_Genomic_155329	T	T
UC_Pep_Genomic_1554963	T	T
UC_Pep_Genomic_155713	T	T
UC_Pep_Genomic_1557147	T	T
UC_Pep_Genomic_1557259	T	T
UC_Pep_Genomic_1558130	T	T
UC_Pep_Genomic_1558835	T	T
UC_Pep_Genomic_1559407	T	T
UC_Pep_Genomic_1561820	T	T
UC_Pep_Genomic_1568085	T	T
UC_Pep_Genomic_1569539	T	T
UC_Pep_Genomic_1571765	T	T
UC_Pep_Genomic_1572081	T	T
UC_Pep_Genomic_1572113	T	T
UC_Pep_Genomic_157264	C	T
UC_Pep_Genomic_1572781	T	T
UC_Pep_Genomic_1573143	T	T
UC_Pep_Genomic_1573565	T	T
UC_Pep_Genomic_1573924	T	T
UC_Pep_Genomic_1574084	T	T
UC_Pep_Genomic_1574278	T	T
UC_Pep_Genomic_1574332	T	T
UC_Pep_Genomic_1574409	T	T
UC_Pep_Genomic_1574575	T	T
UC_Pep_Genomic_1576186	T	T
UC_Pep_Genomic_1579982	T	T
UC_Pep_Genomic_1580460	T	T
UC_Pep_Genomic_1580467	T	T
UC_Pep_Genomic_1581491	T	T
UC_Pep_Genomic_1581827	T	T
UC_Pep_Genomic_1582262	T	T
UC_Pep_Genomic_1582294	T	T
UC_Pep_Genomic_1583046	T	T
UC_Pep_Genomic_1583335	T	T
UC_Pep_Genomic_1583379	T	T
UC_Pep_Genomic_1583440	T	T
UC_Pep_Genomic_1583868	T	T
UC_Pep_Genomic_1583893	T	T
UC_Pep_Genomic_1584229	T	T
UC_Pep_Genomic_1584230	T	T
UC_Pep_Genomic_1585508	T	T
UC_Pep_Genomic_158554	T	T
UC_Pep_Genomic_1586573	T	T
UC_Pep_Genomic_1587905	T	T
UC_Pep_Genomic_1588642	T	T
UC_Pep_Genomic_158905	T	T
UC_Pep_Genomic_1589205	T	T
UC_Pep_Genomic_1590867	T	T
UC_Pep_Genomic_1590954	T	T
UC_Pep_Genomic_1590987	T	T
UC_Pep_Genomic_1591415	T	T
UC_Pep_Genomic_1591458	T	T
UC_Pep_Genomic_1591977	T	T
UC_Pep_Genomic_159328	T	T
UC_Pep_Genomic_1593596	T	T
UC_Pep_Genomic_1593783	T	T
UC_Pep_Genomic_1595084	T	T
UC_Pep_Genomic_1597577	T	T
UC_Pep_Genomic_1597579	T	T
UC_Pep_Genomic_1598083	T	T
UC_Pep_Genomic_1598128	T	T
UC_Pep_Genomic_1598252	T	T
UC_Pep_Genomic_1601276	T	T
UC_Pep_Genomic_1603326	T	T
UC_Pep_Genomic_1603880	T	T
UC_Pep_Genomic_1603894	T	T
UC_Pep_Genomic_1604077	T	T
UC_Pep_Genomic_1604266	T	T
UC_Pep_Genomic_1604468	T	T
UC_Pep_Genomic_1606019	T	T
UC_Pep_Genomic_1606491	T	T
UC_Pep_Genomic_1607830	T	T
UC_Pep_Genomic_1608150	T	T
UC_Pep_Genomic_1608991	T	T
UC_Pep_Genomic_1610888	T	T
UC_Pep_Genomic_1610891	T	T
UC_Pep_Genomic_1611465	T	T
UC_Pep_Genomic_1611478	T	T
UC_Pep_Genomic_1611862	T	T
UC_Pep_Genomic_1611912	T	T
UC_Pep_Genomic_1612127	T	T
UC_Pep_Genomic_1612130	T	T
UC_Pep_Genomic_1612275	T	T
UC_Pep_Genomic_1614601	T	T
UC_Pep_Genomic_1616043	T	T
UC_Pep_Genomic_1617398	T	T
UC_Pep_Genomic_1618420	T	T
UC_Pep_Genomic_1620606	T	T
UC_Pep_Genomic_1623356	T	T
UC_Pep_Genomic_1624792	T	T
UC_Pep_Genomic_1624799	T	T
UC_Pep_Genomic_1626504	T	T
UC_Pep_Genomic_1626597	T	T
UC_Pep_Genomic_1627907	G	T
UC_Pep_Genomic_1628022	T	T
UC_Pep_Genomic_1628254	C	T
UC_Pep_Genomic_1628319	G	T
UC_Pep_Genomic_1628335	T	T
UC_Pep_Genomic_1631085	G	T
UC_Pep_Genomic_1631246	T	T
UC_Pep_Genomic_1631324	G	T
UC_Pep_Genomic_1631378	C	T
UC_Pep_Genomic_1631408	C	T
UC_Pep_Genomic_1631481	C	T
UC_Pep_Genomic_1631638	C	T
UC_Pep_Genomic_1631740	G	T
UC_Pep_Genomic_1631776	G	T
UC_Pep_Genomic_1631949	T	T
UC_Pep_Genomic_1632172	T	T
UC_Pep_Genomic_1632510	T	T
UC_Pep_Genomic_1632598	G	T
UC_Pep_Genomic_1633282	C	T
UC_Pep_Genomic_1634050	C	T
UC_Pep_Genomic_1634063	T	T
UC_Pep_Genomic_1634255	G	T
UC_Pep_Genomic_1634539	T	T
UC_Pep_Genomic_1635249	T	T
UC_Pep_Genomic_1635419	T	T
UC_Pep_Genomic_1635437	T	T
UC_Pep_Genomic_1636367	C	T
UC_Pep_Genomic_1636400	T	T
UC_Pep_Genomic_1636701	C	T
UC_Pep_Genomic_1637045	T	T
UC_Pep_Genomic_1637119	T	T
UC_Pep_Genomic_1637260	C	T
UC_Pep_Genomic_1637300	C	T
UC_Pep_Genomic_1637384	C	T
UC_Pep_Genomic_1637611	T	T
UC_Pep_Genomic_1638084	G	T
UC_Pep_Genomic_1638108	T	T
UC_Pep_Genomic_1638675	G	T
UC_Pep_Genomic_1639134	C	T
UC_Pep_Genomic_1640679	T	T
UC_Pep_Genomic_1641208	T	T
UC_Pep_Genomic_1641329	G	T
UC_Pep_Genomic_1641667	C	T
UC_Pep_Genomic_1642352	T	T
UC_Pep_Genomic_1642523	G	T
UC_Pep_Genomic_1643028	C	T
UC_Pep_Genomic_1643286	C	T
UC_Pep_Genomic_1643347	C	T
UC_Pep_Genomic_1643454	T	T
UC_Pep_Genomic_1643772	T	T
UC_Pep_Genomic_1644452	T	T
UC_Pep_Genomic_1644813	T	T
UC_Pep_Genomic_1645985	G	T
UC_Pep_Genomic_1646647	C	T
UC_Pep_Genomic_1646870	T	T
UC_Pep_Genomic_1646872	T	T
UC_Pep_Genomic_1647240	T	T
UC_Pep_Genomic_1647376	T	T
UC_Pep_Genomic_1647489	T	T
UC_Pep_Genomic_1647589	C	T
UC_Pep_Genomic_1647969	T	T
UC_Pep_Genomic_1651353	C	T
UC_Pep_Genomic_1652158	T	T
UC_Pep_Genomic_1654611	T	T
UC_Pep_Genomic_1654620	C	T
UC_Pep_Genomic_1654632	C	T
UC_Pep_Genomic_1654751	C	T
UC_Pep_Genomic_1654758	C	T
UC_Pep_Genomic_1655726	T	T
UC_Pep_Genomic_1656157	T	T
UC_Pep_Genomic_1656219	C	T
UC_Pep_Genomic_1656374	T	T
UC_Pep_Genomic_1656547	T	T
UC_Pep_Genomic_1656655	T	T
UC_Pep_Genomic_1656752	T	T
UC_Pep_Genomic_1656770	G	T
UC_Pep_Genomic_1657015	G	T
UC_Pep_Genomic_1657451	T	T
UC_Pep_Genomic_1657869	T	T
UC_Pep_Genomic_1658324	T	T
UC_Pep_Genomic_1658895	T	T
UC_Pep_Genomic_1660495	G	T
UC_Pep_Genomic_1665247	T	T
UC_Pep_Genomic_1665375	G	T
UC_Pep_Genomic_1665470	C	T
UC_Pep_Genomic_1668047	C	T
UC_Pep_Genomic_1669697	T	T
UC_Pep_Genomic_1670799	C	T
UC_Pep_Genomic_1671899	T	T
UC_Pep_Genomic_1671902	T	T
UC_Pep_Genomic_1675942	T	T
UC_Pep_Genomic_1675962	T	T
UC_Pep_Genomic_1676369	T	T
UC_Pep_Genomic_1676402	C	T
UC_Pep_Genomic_1676783	C	T
UC_Pep_Genomic_1676967	T	T
UC_Pep_Genomic_1676993	T	T
UC_Pep_Genomic_1676997	T	T
UC_Pep_Genomic_1677301	C	T
UC_Pep_Genomic_1677482	T	T
UC_Pep_Genomic_1677507	T	T
UC_Pep_Genomic_1677997	T	T
UC_Pep_Genomic_1678085	T	T
UC_Pep_Genomic_1680618	C	T
UC_Pep_Genomic_1680624	T	T
UC_Pep_Genomic_1683138	C	T
UC_Pep_Genomic_1683276	C	T
UC_Pep_Genomic_1684168	T	T
UC_Pep_Genomic_1684842	T	T
UC_Pep_Genomic_1689110	C	T
UC_Pep_Genomic_1689355	T	T
UC_Pep_Genomic_1716205	T	T
UC_Pep_Genomic_1719572	T	T
UC_Pep_Genomic_1738460	T	T
UC_Pep_Genomic_1759798	T	T
UC_Pep_Genomic_1767743	T	T
UC_Pep_Genomic_1769715	C	T
UC_Pep_Genomic_1770254	T	T
UC_Pep_Genomic_177127	C	T
UC_Pep_Genomic_1771777	T	T
UC_Pep_Genomic_1773535	T	T
UC_Pep_Genomic_1775561	T	T
UC_Pep_Genomic_1775594	T	T
UC_Pep_Genomic_1776218	T	T
UC_Pep_Genomic_1781476	T	T
UC_Pep_Genomic_1783688	T	T
UC_Pep_Genomic_1801046	T	T
UC_Pep_Genomic_1801050	T	T
UC_Pep_Genomic_1801214	T	T
UC_Pep_Genomic_1836158	C	T
UC_Pep_Genomic_1838103	T	T
UC_Pep_Genomic_1838438	T	T
UC_Pep_Genomic_1838441	T	T
UC_Pep_Genomic_1839493	T	T
UC_Pep_Genomic_1840889	T	T
UC_Pep_Genomic_1844767	T	T
UC_Pep_Genomic_1852263	T	T
UC_Pep_Genomic_185553	C	T
UC_Pep_Genomic_1866880	T	T
UC_Pep_Genomic_1867329	T	T
UC_Pep_Genomic_186888	C	T
UC_Pep_Genomic_1873866	G	T
UC_Pep_Genomic_1874342	C	T
UC_Pep_Genomic_1874842	C	T
UC_Pep_Genomic_1877744	T	T
UC_Pep_Genomic_1878403	T	T
UC_Pep_Genomic_1878913	T	T
UC_Pep_Genomic_1879022	T	T
UC_Pep_Genomic_1879038	T	T
UC_Pep_Genomic_1880501	G	T
UC_Pep_Genomic_1881850	G	T
UC_Pep_Genomic_1882879	C	T
UC_Pep_Genomic_1882881	C	T
UC_Pep_Genomic_1882984	C	T
UC_Pep_Genomic_1885125	C	T
UC_Pep_Genomic_1890234	T	T
UC_Pep_Genomic_1890243	T	T
UC_Pep_Genomic_1893968	C	T
UC_Pep_Genomic_1902035	T	T
UC_Pep_Genomic_1903680	T	T
UC_Pep_Genomic_1904855	T	T
UC_Pep_Genomic_1906309	C	T
UC_Pep_Genomic_1909978	T	T
UC_Pep_Genomic_1912559	C	T
UC_Pep_Genomic_1914061	T	T
UC_Pep_Genomic_1924659	T	T
UC_Pep_Genomic_1925166	T	T
UC_Pep_Genomic_1925167	G	T
UC_Pep_Genomic_1931415	C	T
UC_Pep_Genomic_1931486	T	T
UC_Pep_Genomic_1932430	T	T
UC_Pep_Genomic_1933969	T	T
UC_Pep_Genomic_1936194	T	T
UC_Pep_Genomic_1936242	T	T
UC_Pep_Genomic_1946559	T	T
UC_Pep_Genomic_1947297	T	T
UC_Pep_Genomic_1947872	T	T
UC_Pep_Genomic_1947909	C	T
UC_Pep_Genomic_1950315	T	T
UC_Pep_Genomic_1952054	T	T
UC_Pep_Genomic_1953320	C	T
UC_Pep_Genomic_1953414	T	T
UC_Pep_Genomic_1953531	T	T
UC_Pep_Genomic_1959915	T	T
UC_Pep_Genomic_1960414	T	T
UC_Pep_Genomic_1960488	T	T
UC_Pep_Genomic_1961449	C	T
UC_Pep_Genomic_1962097	C	T
UC_Pep_Genomic_1962163	C	T
UC_Pep_Genomic_1962526	C	T
UC_Pep_Genomic_1962653	C	T
UC_Pep_Genomic_1962831	T	T
UC_Pep_Genomic_1962928	G	T
UC_Pep_Genomic_1962940	C	T
UC_Pep_Genomic_1963676	T	T
UC_Pep_Genomic_1964912	T	T
UC_Pep_Genomic_1965867	T	T
UC_Pep_Genomic_1965939	T	T
UC_Pep_Genomic_1966135	C	T
UC_Pep_Genomic_1967085	T	T
UC_Pep_Genomic_1967091	T	T
UC_Pep_Genomic_1967161	C	T
UC_Pep_Genomic_1967170	G	T
UC_Pep_Genomic_1967210	C	T
UC_Pep_Genomic_1967617	C	T
UC_Pep_Genomic_1967928	G	T
UC_Pep_Genomic_1967998	C	T
UC_Pep_Genomic_1968297	G	T
UC_Pep_Genomic_1968443	C	T
UC_Pep_Genomic_1968473	T	T
UC_Pep_Genomic_1968612	C	T
UC_Pep_Genomic_1968733	T	T
UC_Pep_Genomic_1968957	T	T
UC_Pep_Genomic_1969831	T	T
UC_Pep_Genomic_1969834	T	T
UC_Pep_Genomic_1970514	C	T
UC_Pep_Genomic_1970732	T	T
UC_Pep_Genomic_1971222	T	T
UC_Pep_Genomic_1971298	T	T
UC_Pep_Genomic_1971393	T	T
UC_Pep_Genomic_1971469	T	T
UC_Pep_Genomic_1971506	T	T
UC_Pep_Genomic_1971939	T	T
UC_Pep_Genomic_1972191	T	T
UC_Pep_Genomic_1973619	T	T
UC_Pep_Genomic_1973756	T	T
UC_Pep_Genomic_1973915	T	T
UC_Pep_Genomic_1976489	T	T
UC_Pep_Genomic_1976663	T	T
UC_Pep_Genomic_1976731	T	T
UC_Pep_Genomic_1976732	T	T
UC_Pep_Genomic_1976838	T	T
UC_Pep_Genomic_1977087	T	T
UC_Pep_Genomic_1977253	T	T
UC_Pep_Genomic_1977277	T	T
UC_Pep_Genomic_1977351	T	T
UC_Pep_Genomic_1977371	T	T
UC_Pep_Genomic_1978057	T	T
UC_Pep_Genomic_1978139	T	T
UC_Pep_Genomic_1978714	T	T
UC_Pep_Genomic_1978715	T	T
UC_Pep_Genomic_1981048	T	T
UC_Pep_Genomic_1981049	T	T
UC_Pep_Genomic_1981124	T	T
UC_Pep_Genomic_1981667	T	T
UC_Pep_Genomic_1981679	T	T
UC_Pep_Genomic_1982363	T	T
UC_Pep_Genomic_1984270	T	T
UC_Pep_Genomic_1984294	T	T
UC_Pep_Genomic_1984362	T	T
UC_Pep_Genomic_1984542	T	T
UC_Pep_Genomic_1984763	T	T
UC_Pep_Genomic_1985151	T	T
UC_Pep_Genomic_1985375	T	T
UC_Pep_Genomic_1986621	T	T
UC_Pep_Genomic_1986813	T	T
UC_Pep_Genomic_1986913	T	T
UC_Pep_Genomic_1993444	T	T
UC_Pep_Genomic_1994668	T	T
UC_Pep_Genomic_1995497	T	T
UC_Pep_Genomic_1995629	T	T
UC_Pep_Genomic_1999858	T	T
UC_Pep_Genomic_2000446	T	T
UC_Pep_Genomic_2000870	T	T
UC_Pep_Genomic_2000892	T	T
UC_Pep_Genomic_200153	T	T
UC_Pep_Genomic_2013475	T	T
UC_Pep_Genomic_2015857	T	T
UC_Pep_Genomic_2015885	T	T
UC_Pep_Genomic_2016885	T	T
UC_Pep_Genomic_2019422	T	T
UC_Pep_Genomic_2021104	T	T
UC_Pep_Genomic_2021441	T	T
UC_Pep_Genomic_2022102	T	T
UC_Pep_Genomic_2022236	T	T
UC_Pep_Genomic_2023373	T	T
UC_Pep_Genomic_2024904	T	T
UC_Pep_Genomic_2025350	T	T
UC_Pep_Genomic_2025351	failed	T
UC_Pep_Genomic_2025358	T	T
UC_Pep_Genomic_2026695	T	T
UC_Pep_Genomic_2037550	T	T
UC_Pep_Genomic_2044479	T	T
UC_Pep_Genomic_2049643	T	T
UC_Pep_Genomic_2054186	T	T
UC_Pep_Genomic_2054743	T	T
UC_Pep_Genomic_2060276	T	T
UC_Pep_Genomic_2072217	T	T
UC_Pep_Genomic_2074475	T	T
UC_Pep_Genomic_2079701	T	T
UC_Pep_Genomic_2081052	T	T
UC_Pep_Genomic_2081982	T	T
UC_Pep_Genomic_2084833	T	T
UC_Pep_Genomic_2085037	T	T
UC_Pep_Genomic_2085152	T	T
UC_Pep_Genomic_2086785	T	T
UC_Pep_Genomic_2088712	T	T
UC_Pep_Genomic_2091579	T	T
UC_Pep_Genomic_2091646	T	T
UC_Pep_Genomic_2092507	T	T
UC_Pep_Genomic_2093896	T	T
UC_Pep_Genomic_2127979	T	T
UC_Pep_Genomic_2130470	T	T
UC_Pep_Genomic_2130706	T	T
UC_Pep_Genomic_2136389	T	T
UC_Pep_Genomic_2140940	T	T
UC_Pep_Genomic_2172007	T	T
UC_Pep_Genomic_2175786	T	T
UC_Pep_Genomic_2178330	T	T
UC_Pep_Genomic_2207147	T	T
UC_Pep_Genomic_2208695	T	T
UC_Pep_Genomic_2227633	T	T
UC_Pep_Genomic_2228090	T	T
UC_Pep_Genomic_2235680	T	T
UC_Pep_Genomic_2238176	T	T
UC_Pep_Genomic_2248716	T	T
UC_Pep_Genomic_2249422	T	T
UC_Pep_Genomic_2249424	T	T
UC_Pep_Genomic_2250883	T	T
UC_Pep_Genomic_2257520	T	T
UC_Pep_Genomic_2259414	T	T
UC_Pep_Genomic_2270763	T	T
UC_Pep_Genomic_2270927	T	T
UC_Pep_Genomic_2271157	T	T
UC_Pep_Genomic_2272258	T	T
UC_Pep_Genomic_2272949	T	T
UC_Pep_Genomic_2273369	T	T
UC_Pep_Genomic_2281553	T	T
UC_Pep_Genomic_2286702	T	T
UC_Pep_Genomic_2291357	T	T
UC_Pep_Genomic_2305360	T	T
UC_Pep_Genomic_2305366	T	T
UC_Pep_Genomic_2308180	T	T
UC_Pep_Genomic_2316550	T	T
UC_Pep_Genomic_2325172	T	T
UC_Pep_Genomic_2338164	T	T
UC_Pep_Genomic_2348169	T	T
UC_Pep_Genomic_2352696	T	T
UC_Pep_Genomic_2367237	T	T
UC_Pep_Genomic_2375079	T	T
UC_Pep_Genomic_2377524	T	T
UC_Pep_Genomic_2384117	T	T
UC_Pep_Genomic_2388042	T	T
UC_Pep_Genomic_2393966	T	T
UC_Pep_Genomic_2418752	T	T
UC_Pep_Genomic_2419122	T	T
UC_Pep_Genomic_2426308	T	T
UC_Pep_Genomic_2433953	T	T
UC_Pep_Genomic_2437193	T	T
UC_Pep_Genomic_2444166	T	T
UC_Pep_Genomic_2451964	T	T
UC_Pep_Genomic_2453446	T	T
UC_Pep_Genomic_2455980	T	T
UC_Pep_Genomic_2461483	T	T
UC_Pep_Genomic_2462076	T	T
UC_Pep_Genomic_2472780	T	T
UC_Pep_Genomic_2474601	T	T
UC_Pep_Genomic_2475849	G	T
UC_Pep_Genomic_2479799	T	T
UC_Pep_Genomic_2492500	T	T
UC_Pep_Genomic_2498059	T	T
UC_Pep_Genomic_2498855	C	T
UC_Pep_Genomic_2499001	C	T
UC_Pep_Genomic_2504411	C	T
UC_Pep_Genomic_2504964	T	T
UC_Pep_Genomic_2504988	T	T
UC_Pep_Genomic_2505317	T	T
UC_Pep_Genomic_2506470	G	T
UC_Pep_Genomic_2507428	C	T
UC_Pep_Genomic_2507699	G	T
UC_Pep_Genomic_2508558	T	T
UC_Pep_Genomic_2510796	T	T
UC_Pep_Genomic_2516218	C	T
UC_Pep_Genomic_2520878	C	T
UC_Pep_Genomic_2526772	T	T
UC_Pep_Genomic_2527697	C	T
UC_Pep_Genomic_2528155	G	T
UC_Pep_Genomic_2530761	C	T
UC_Pep_Genomic_2532394	G	T
UC_Pep_Genomic_2533992	C	T
UC_Pep_Genomic_2536314	C	T
UC_Pep_Genomic_2537447	G	T
UC_Pep_Genomic_2537520	C	T
UC_Pep_Genomic_2538135	T	T
UC_Pep_Genomic_2538349	C	T
UC_Pep_Genomic_2539931	T	T
UC_Pep_Genomic_2540627	T	T
UC_Pep_Genomic_2540732	C	T
UC_Pep_Genomic_2540740	T	T
UC_Pep_Genomic_2541229	T	T
UC_Pep_Genomic_2541525	T	T
UC_Pep_Genomic_2541877	T	T
UC_Pep_Genomic_2541969	T	T
UC_Pep_Genomic_2542672	T	T
UC_Pep_Genomic_2542961	T	T
UC_Pep_Genomic_2544527	T	T
UC_Pep_Genomic_2549828	T	T
UC_Pep_Genomic_2549867	T	T
UC_Pep_Genomic_2557127	T	T
UC_Pep_Genomic_2570026	T	T
UC_Pep_Genomic_2571061	T	T
UC_Pep_Genomic_2572591	T	T
UC_Pep_Genomic_2572786	T	T
UC_Pep_Genomic_2574546	T	T
UC_Pep_Genomic_2583036	T	T
UC_Pep_Genomic_2583038	T	T
UC_Pep_Genomic_2584777	T	T
UC_Pep_Genomic_2596749	T	T
UC_Pep_Genomic_2600994	T	T
UC_Pep_Genomic_2600996	T	T
UC_Pep_Genomic_2611999	T	T
UC_Pep_Genomic_2621422	T	T
UC_Pep_Genomic_2621471	T	T
UC_Pep_Genomic_2621759	T	T
UC_Pep_Genomic_2623014	T	T
UC_Pep_Genomic_2640162	T	T
UC_Pep_Genomic_2641476	T	T
UC_Pep_Genomic_2657617	T	T
UC_Pep_Genomic_2658788	T	T
UC_Pep_Genomic_2674302	T	T
UC_Pep_Genomic_2696764	T	T
UC_Pep_Genomic_2702477	T	T
UC_Pep_Genomic_2703438	T	T
UC_Pep_Genomic_2724075	T	T
UC_Pep_Genomic_2729643	T	T
UC_Pep_Genomic_2738345	T	T
UC_Pep_Genomic_2745946	T	T
UC_Pep_Genomic_2746189	T	T
UC_Pep_Genomic_2746781	T	T
UC_Pep_Genomic_2746924	T	T
UC_Pep_Genomic_2746934	T	T
UC_Pep_Genomic_2747753	T	T
UC_Pep_Genomic_2748053	T	T
UC_Pep_Genomic_2761285	T	T
UC_Pep_Genomic_2761609	T	T
UC_Pep_Genomic_2762145	T	T
UC_Pep_Genomic_2764556	T	T
UC_Pep_Genomic_2783631	T	T
UC_Pep_Genomic_2787582	T	T
UC_Pep_Genomic_2789603	T	T
UC_Pep_Genomic_2791093	T	T
UC_Pep_Genomic_2801762	T	T
UC_Pep_Genomic_283427	C	T
UC_Pep_Genomic_2840517	T	T
UC_Pep_Genomic_2845232	T	T
UC_Pep_Genomic_2850320	T	T
UC_Pep_Genomic_2871263	T	T
UC_Pep_Genomic_2878258	T	T
UC_Pep_Genomic_2881163	T	T
UC_Pep_Genomic_2882169	C	T
UC_Pep_Genomic_2882991	T	T
UC_Pep_Genomic_289072	T	T
UC_Pep_Genomic_2896040	T	T
UC_Pep_Genomic_2897629	T	T
UC_Pep_Genomic_2898388	T	T
UC_Pep_Genomic_2899003	T	T
UC_Pep_Genomic_2925544	T	T
UC_Pep_Genomic_2925547	T	T
UC_Pep_Genomic_2925971	T	T
UC_Pep_Genomic_2931999	T	T
UC_Pep_Genomic_2948097	T	T
UC_Pep_Genomic_2952532	T	T
UC_Pep_Genomic_2960065	T	T
UC_Pep_Genomic_2969820	T	T
UC_Pep_Genomic_2972119	T	T
UC_Pep_Genomic_2972528	T	T
UC_Pep_Genomic_2972737	T	T
UC_Pep_Genomic_2977384	T	T
UC_Pep_Genomic_2980642	T	T
UC_Pep_Genomic_2983739	T	T
UC_Pep_Genomic_2994524	T	T
UC_Pep_Genomic_2996373	T	T
UC_Pep_Genomic_3000808	T	T
UC_Pep_Genomic_3002150	T	T
UC_Pep_Genomic_3002153	T	T
UC_Pep_Genomic_3006443	T	T
UC_Pep_Genomic_3006521	T	T
UC_Pep_Genomic_3008719	T	T
UC_Pep_Genomic_3012653	T	T
UC_Pep_Genomic_3015868	T	T
UC_Pep_Genomic_3016409	T	T
UC_Pep_Genomic_3018132	T	T
UC_Pep_Genomic_3019282	T	T
UC_Pep_Genomic_3024805	T	T
UC_Pep_Genomic_3028993	T	T
UC_Pep_Genomic_3029020	T	T
UC_Pep_Genomic_3030194	T	T
UC_Pep_Genomic_3030737	T	T
UC_Pep_Genomic_3031230	T	T
UC_Pep_Genomic_3033234	T	T
UC_Pep_Genomic_3037822	T	T
UC_Pep_Genomic_3040958	T	T
UC_Pep_Genomic_3041045	T	T
UC_Pep_Genomic_3045046	T	T
UC_Pep_Genomic_3045750	T	T
UC_Pep_Genomic_3046450	T	T
UC_Pep_Genomic_3048562	T	T
UC_Pep_Genomic_3049293	T	T
UC_Pep_Genomic_3049773	T	T
UC_Pep_Genomic_3050451	T	T
UC_Pep_Genomic_3053927	T	T
UC_Pep_Genomic_3060139	T	T
UC_Pep_Genomic_3064376	T	T
UC_Pep_Genomic_3066739	T	T
UC_Pep_Genomic_3066740	T	T
UC_Pep_Genomic_3068410	T	T
UC_Pep_Genomic_3068530	T	T
UC_Pep_Genomic_3070955	T	T
UC_Pep_Genomic_3071145	T	T
UC_Pep_Genomic_3073648	T	T
UC_Pep_Genomic_3073735	T	T
UC_Pep_Genomic_3073772	T	T
UC_Pep_Genomic_3073823	T	T
UC_Pep_Genomic_3074134	T	T
UC_Pep_Genomic_3074766	T	T
UC_Pep_Genomic_3075756	T	T
UC_Pep_Genomic_3076750	T	T
UC_Pep_Genomic_3081005	T	T
UC_Pep_Genomic_3081317	T	T
UC_Pep_Genomic_3081588	T	T
UC_Pep_Genomic_3081690	T	T
UC_Pep_Genomic_3082706	T	T
UC_Pep_Genomic_3083000	T	T
UC_Pep_Genomic_3083683	T	T
UC_Pep_Genomic_3083794	T	T
UC_Pep_Genomic_3083927	T	T
UC_Pep_Genomic_3085596	T	T
UC_Pep_Genomic_3085631	T	T
UC_Pep_Genomic_3085861	T	T
UC_Pep_Genomic_3085974	T	T
UC_Pep_Genomic_3086302	T	T
UC_Pep_Genomic_3086494	T	T
UC_Pep_Genomic_3088064	T	T
UC_Pep_Genomic_3088226	T	T
UC_Pep_Genomic_3091186	T	T
UC_Pep_Genomic_3091901	T	T
UC_Pep_Genomic_3092048	T	T
UC_Pep_Genomic_3096253	T	T
UC_Pep_Genomic_3096421	T	T
UC_Pep_Genomic_3097369	T	T
UC_Pep_Genomic_3097370	T	T
UC_Pep_Genomic_3097443	T	T
UC_Pep_Genomic_3097611	T	T
UC_Pep_Genomic_3097626	T	T
UC_Pep_Genomic_3098069	T	T
UC_Pep_Genomic_3099029	T	T
UC_Pep_Genomic_3099117	T	T
UC_Pep_Genomic_3101351	T	T
UC_Pep_Genomic_3101525	T	T
UC_Pep_Genomic_3101579	T	T
UC_Pep_Genomic_3102031	T	T
UC_Pep_Genomic_3102070	T	T
UC_Pep_Genomic_3102174	T	T
UC_Pep_Genomic_3102914	T	T
UC_Pep_Genomic_3103165	T	T
UC_Pep_Genomic_3103431	T	T
UC_Pep_Genomic_3104474	T	T
UC_Pep_Genomic_3104516	T	T
UC_Pep_Genomic_3105462	T	T
UC_Pep_Genomic_3105788	T	T
UC_Pep_Genomic_3105814	T	T
UC_Pep_Genomic_3106070	T	T
UC_Pep_Genomic_3106134	T	T
UC_Pep_Genomic_3106235	T	T
UC_Pep_Genomic_3106289	T	T
UC_Pep_Genomic_3107122	T	T
UC_Pep_Genomic_3107988	T	T
UC_Pep_Genomic_3108476	T	T
UC_Pep_Genomic_3108717	T	T
UC_Pep_Genomic_3109842	T	T
UC_Pep_Genomic_3109937	T	T
UC_Pep_Genomic_3110342	T	T
UC_Pep_Genomic_3110384	T	T
UC_Pep_Genomic_3111198	C	T
UC_Pep_Genomic_3111484	T	T
UC_Pep_Genomic_3111612	T	T
UC_Pep_Genomic_3111698	T	T
UC_Pep_Genomic_3111860	T	T
UC_Pep_Genomic_3115891	T	T
UC_Pep_Genomic_3119111	T	T
UC_Pep_Genomic_3120295	T	T
UC_Pep_Genomic_3120801	G	T
UC_Pep_Genomic_3121953	G	T
UC_Pep_Genomic_3121972	G	T
UC_Pep_Genomic_3130725	T	T
UC_Pep_Genomic_3130797	T	T
UC_Pep_Genomic_3130946	T	T
UC_Pep_Genomic_3137978	C	T
UC_Pep_Genomic_3138847	G	T
UC_Pep_Genomic_3139083	T	T
UC_Pep_Genomic_3139698	C	T
UC_Pep_Genomic_3145026	C	T
UC_Pep_Genomic_3148134	C	T
UC_Pep_Genomic_3148753	T	T
UC_Pep_Genomic_3149184	C	T
UC_Pep_Genomic_3149193	T	T
UC_Pep_Genomic_3152249	T	T
UC_Pep_Genomic_3154017	T	T
UC_Pep_Genomic_3158476	T	T
UC_Pep_Genomic_3166609	C	T
UC_Pep_Genomic_3167322	T	T
UC_Pep_Genomic_3167441	T	T
UC_Pep_Genomic_3171407	T	T
UC_Pep_Genomic_3172694	T	T
UC_Pep_Genomic_3182987	C	T
UC_Pep_Genomic_3183795	G	T
UC_Pep_Genomic_3185450	C	T
UC_Pep_Genomic_3188023	G	T
UC_Pep_Genomic_3188924	G	T
UC_Pep_Genomic_3192977	T	T
UC_Pep_Genomic_3193633	T	T
UC_Pep_Genomic_3212346	C	T
UC_Pep_Genomic_3214414	C	T
UC_Pep_Genomic_3223277	T	T
UC_Pep_Genomic_3227868	T	T
UC_Pep_Genomic_3244049	T	T
UC_Pep_Genomic_3257621	G	T
UC_Pep_Genomic_3259019	C	T
UC_Pep_Genomic_3265225	T	T
UC_Pep_Genomic_3277004	T	T
UC_Pep_Genomic_3322847	T	T
UC_Pep_Genomic_3324830	T	T
UC_Pep_Genomic_3328594	T	T
UC_Pep_Genomic_3330121	T	T
UC_Pep_Genomic_3330122	T	T
UC_Pep_Genomic_3336657	T	T
UC_Pep_Genomic_3337502	T	T
UC_Pep_Genomic_3343807	T	T
UC_Pep_Genomic_3347976	T	T
UC_Pep_Genomic_3352775	T	T
UC_Pep_Genomic_3360258	G	T
UC_Pep_Genomic_3360886	C	T
UC_Pep_Genomic_3361132	failed	T
UC_Pep_Genomic_3363274	T	T
UC_Pep_Genomic_3378788	T	T
UC_Pep_Genomic_3381408	T	T
UC_Pep_Genomic_3389271	T	T
UC_Pep_Genomic_3419001	G	T
UC_Pep_Genomic_3423347	T	T
UC_Pep_Genomic_3423558	T	T
UC_Pep_Genomic_3426996	T	T
UC_Pep_Genomic_3429151	C	T
UC_Pep_Genomic_3436243	T	T
UC_Pep_Genomic_3443458	T	T
UC_Pep_Genomic_3448372	T	T
UC_Pep_Genomic_3449022	T	T
UC_Pep_Genomic_3454374	T	T
UC_Pep_Genomic_3466376	T	T
UC_Pep_Genomic_3497399	T	T
UC_Pep_Genomic_3527293	T	T
UC_Pep_Genomic_3538501	T	T
UC_Pep_Genomic_3555704	G	T
UC_Pep_Genomic_3581523	T	T
UC_Pep_Genomic_3629911	T	T
UC_Pep_Genomic_3646026	T	T
UC_Pep_Genomic_3660496	T	T
UC_Pep_Genomic_3660501	T	T
UC_Pep_Genomic_3675406	T	T
UC_Pep_Genomic_3677773	C	T
UC_Pep_Genomic_3677859	C	T
UC_Pep_Genomic_3678227	G	T
UC_Pep_Genomic_3680806	G	T
UC_Pep_Genomic_3682847	C	T
UC_Pep_Genomic_3684876	T	T
UC_Pep_Genomic_3689045	C	T
UC_Pep_Genomic_3700385	G	T
UC_Pep_Genomic_3700596	T	T
UC_Pep_Genomic_3702484	T	T
UC_Pep_Genomic_3703361	T	T
UC_Pep_Genomic_3709411	C	T
UC_Pep_Genomic_3709900	T	T
UC_Pep_Genomic_3710105	C	T
UC_Pep_Genomic_3710116	G	T
UC_Pep_Genomic_3710956	T	T
UC_Pep_Genomic_3711323	C	T
UC_Pep_Genomic_3711694	G	T
UC_Pep_Genomic_3743236	T	T
UC_Pep_Genomic_3744606	T	T
UC_Pep_Genomic_3747111	G	T
UC_Pep_Genomic_3748373	T	T
UC_Pep_Genomic_3749829	C	T
UC_Pep_Genomic_3751054	G	T
UC_Pep_Genomic_3758020	C	T
UC_Pep_Genomic_3758570	T	T
UC_Pep_Genomic_3759500	T	T
UC_Pep_Genomic_3759758	C	T
UC_Pep_Genomic_3761951	T	T
UC_Pep_Genomic_3763850	T	T
UC_Pep_Genomic_3763893	T	T
UC_Pep_Genomic_3764586	C	T
UC_Pep_Genomic_3765384	C	T
UC_Pep_Genomic_3765616	C	T
UC_Pep_Genomic_3768896	G	T
UC_Pep_Genomic_3770340	G	T
UC_Pep_Genomic_3770596	T	T
UC_Pep_Genomic_3770601	T	T
UC_Pep_Genomic_3771161	T	T
UC_Pep_Genomic_3775833	T	T
UC_Pep_Genomic_3776457	T	T
UC_Pep_Genomic_3777836	G	T
UC_Pep_Genomic_3788225	C	T
UC_Pep_Genomic_3790032	T	T
UC_Pep_Genomic_3790256	T	T
UC_Pep_Genomic_3790547	T	T
UC_Pep_Genomic_3801810	T	T
UC_Pep_Genomic_3803785	T	T
UC_Pep_Genomic_3811883	failed	T
UC_Pep_Genomic_3812840	C	T
UC_Pep_Genomic_3819025	C	T
UC_Pep_Genomic_3820587	T	T
UC_Pep_Genomic_3820630	T	T
UC_Pep_Genomic_3820712	G	T
UC_Pep_Genomic_3822309	T	T
UC_Pep_Genomic_3822519	C	T
UC_Pep_Genomic_3823302	T	T
UC_Pep_Genomic_3824328	T	T
UC_Pep_Genomic_3824725	T	T
UC_Pep_Genomic_3826581	T	T
UC_Pep_Genomic_3827173	G	T
UC_Pep_Genomic_3827188	C	T
UC_Pep_Genomic_3827596	G	T
UC_Pep_Genomic_3827610	C	T
UC_Pep_Genomic_3828293	T	T
UC_Pep_Genomic_3828560	T	T
UC_Pep_Genomic_3829754	C	T
UC_Pep_Genomic_3830004	C	T
UC_Pep_Genomic_3831584	T	T
UC_Pep_Genomic_3831736	T	T
UC_Pep_Genomic_3831744	T	T
UC_Pep_Genomic_3832755	T	T
UC_Pep_Genomic_3833127	T	T
UC_Pep_Genomic_3833174	T	T
UC_Pep_Genomic_3833250	T	T
UC_Pep_Genomic_3833345	C	T
UC_Pep_Genomic_3833377	C	T
UC_Pep_Genomic_3833687	C	T
UC_Pep_Genomic_3834505	T	T
UC_Pep_Genomic_3834588	T	T
UC_Pep_Genomic_3834862	T	T
UC_Pep_Genomic_3835053	T	T
UC_Pep_Genomic_3835144	T	T
UC_Pep_Genomic_3835352	T	T
UC_Pep_Genomic_3835357	T	T
UC_Pep_Genomic_3835505	T	T
UC_Pep_Genomic_3836445	C	T
UC_Pep_Genomic_3838242	T	T
UC_Pep_Genomic_3838260	T	T
UC_Pep_Genomic_3838283	T	T
UC_Pep_Genomic_3838723	T	T
UC_Pep_Genomic_3840189	T	T
UC_Pep_Genomic_3846230	T	T
UC_Pep_Genomic_3846300	T	T
UC_Pep_Genomic_3846328	T	T
UC_Pep_Genomic_3846347	T	T
UC_Pep_Genomic_3846352	T	T
UC_Pep_Genomic_3846595	T	T
UC_Pep_Genomic_3846601	T	T
UC_Pep_Genomic_3846623	T	T
UC_Pep_Genomic_3846629	C	T
UC_Pep_Genomic_3846744	T	T
UC_Pep_Genomic_3846834	T	T
UC_Pep_Genomic_3846917	C	T
UC_Pep_Genomic_3847123	C	T
UC_Pep_Genomic_3847842	G	T
UC_Pep_Genomic_3847898	T	T
UC_Pep_Genomic_3847967	T	T
UC_Pep_Genomic_3848062	C	T
UC_Pep_Genomic_3848904	C	T
UC_Pep_Genomic_3849405	T	T
UC_Pep_Genomic_3849771	C	T
UC_Pep_Genomic_3849885	T	T
UC_Pep_Genomic_3849944	T	T
UC_Pep_Genomic_3850094	T	T
UC_Pep_Genomic_3850975	T	T
UC_Pep_Genomic_3851236	C	T
UC_Pep_Genomic_3851259	G	T
UC_Pep_Genomic_3851554	T	T
UC_Pep_Genomic_3852721	T	T
UC_Pep_Genomic_3852764	T	T
UC_Pep_Genomic_3852767	C	T
UC_Pep_Genomic_3853693	C	T
UC_Pep_Genomic_3853807	C	T
UC_Pep_Genomic_3853829	C	T
UC_Pep_Genomic_3853965	T	T
UC_Pep_Genomic_3854206	G	T
UC_Pep_Genomic_3854498	G	T
UC_Pep_Genomic_3854510	T	T
UC_Pep_Genomic_3854675	T	T
UC_Pep_Genomic_3856314	T	T
UC_Pep_Genomic_3856739	T	T
UC_Pep_Genomic_3856876	C	T
UC_Pep_Genomic_3856959	C	T
UC_Pep_Genomic_3856964	G	T
UC_Pep_Genomic_3856996	G	T
UC_Pep_Genomic_3857489	T	T
UC_Pep_Genomic_3857748	T	T
UC_Pep_Genomic_3858860	T	T
UC_Pep_Genomic_3859245	T	T
UC_Pep_Genomic_3859465	T	T
UC_Pep_Genomic_3859605	T	T
UC_Pep_Genomic_3859630	T	T
UC_Pep_Genomic_3859634	T	T
UC_Pep_Genomic_3859696	T	T
UC_Pep_Genomic_3860593	T	T
UC_Pep_Genomic_3860700	T	T
UC_Pep_Genomic_3860783	T	T
UC_Pep_Genomic_3861081	T	T
UC_Pep_Genomic_3861215	T	T
UC_Pep_Genomic_3861332	T	T
UC_Pep_Genomic_3861355	T	T
UC_Pep_Genomic_3861417	T	T
UC_Pep_Genomic_3861842	T	T
UC_Pep_Genomic_3862128	T	T
UC_Pep_Genomic_3869052	G	T
UC_Pep_Genomic_3869063	C	T
UC_Pep_Genomic_3869066	G	T
UC_Pep_Genomic_3875520	T	T
UC_Pep_Genomic_3876419	T	T
UC_Pep_Genomic_3877966	T	T
UC_Pep_Genomic_3888733	T	T
UC_Pep_Genomic_3889383	T	T
UC_Pep_Genomic_3894658	T	T
UC_Pep_Genomic_3895155	T	T
UC_Pep_Genomic_3904139	T	T
UC_Pep_Genomic_3904152	T	T
UC_Pep_Genomic_3904947	T	T
UC_Pep_Genomic_3906232	T	T
UC_Pep_Genomic_3912067	T	T
UC_Pep_Genomic_3912211	T	T
UC_Pep_Genomic_3915831	T	T
UC_Pep_Genomic_3916628	T	T
UC_Pep_Genomic_3918275	T	T
UC_Pep_Genomic_3935965	T	T
UC_Pep_Genomic_3951702	T	T
UC_Pep_Genomic_3953359	T	T
UC_Pep_Genomic_3953477	T	T
UC_Pep_Genomic_3953694	T	T
UC_Pep_Genomic_3953734	T	T
UC_Pep_Genomic_3953811	T	T
UC_Pep_Genomic_3953812	T	T
UC_Pep_Genomic_3953815	T	T
UC_Pep_Genomic_3954175	T	T
UC_Pep_Genomic_3954198	T	T
UC_Pep_Genomic_3954589	T	T
UC_Pep_Genomic_3954593	T	T
UC_Pep_Genomic_3955136	T	T
UC_Pep_Genomic_3955335	T	T
UC_Pep_Genomic_3956905	T	T
UC_Pep_Genomic_3956954	T	T
UC_Pep_Genomic_3956964	T	T
UC_Pep_Genomic_3957177	T	T
UC_Pep_Genomic_3957416	T	T
UC_Pep_Genomic_3959461	T	T
UC_Pep_Genomic_3959516	T	T
UC_Pep_Genomic_3959620	T	T
UC_Pep_Genomic_3959646	T	T
UC_Pep_Genomic_3960068	T	T
UC_Pep_Genomic_3960879	T	T
UC_Pep_Genomic_3961146	T	T
UC_Pep_Genomic_3961157	T	T
UC_Pep_Genomic_3961178	T	T
UC_Pep_Genomic_3961437	T	T
UC_Pep_Genomic_3962626	T	T
UC_Pep_Genomic_3963587	T	T
UC_Pep_Genomic_3963804	T	T
UC_Pep_Genomic_3964031	T	T
UC_Pep_Genomic_3964735	T	T
UC_Pep_Genomic_3964775	T	T
UC_Pep_Genomic_3964917	T	T
UC_Pep_Genomic_3965055	T	T
UC_Pep_Genomic_3965236	T	T
UC_Pep_Genomic_3965246	T	T
UC_Pep_Genomic_3965623	T	T
UC_Pep_Genomic_3965784	T	T
UC_Pep_Genomic_3965786	T	T
UC_Pep_Genomic_3966472	T	T
UC_Pep_Genomic_3966483	T	T
UC_Pep_Genomic_3968339	T	T
UC_Pep_Genomic_3968379	T	T
UC_Pep_Genomic_3968460	T	T
UC_Pep_Genomic_3968740	G	T
UC_Pep_Genomic_3969359	C	T
UC_Pep_Genomic_3970482	G	T
UC_Pep_Genomic_3970506	C	T
UC_Pep_Genomic_3970594	T	T
UC_Pep_Genomic_3970684	T	T
UC_Pep_Genomic_3971014	G	T
UC_Pep_Genomic_3971305	C	T
UC_Pep_Genomic_3972191	T	T
UC_Pep_Genomic_3972360	T	T
UC_Pep_Genomic_3972385	T	T
UC_Pep_Genomic_3973541	G	T
UC_Pep_Genomic_3973578	T	T
UC_Pep_Genomic_3973611	T	T
UC_Pep_Genomic_3973732	T	T
UC_Pep_Genomic_3974344	T	T
UC_Pep_Genomic_3974725	T	T
UC_Pep_Genomic_3975402	C	T
UC_Pep_Genomic_3975776	G	T
UC_Pep_Genomic_3976235	T	T
UC_Pep_Genomic_3976271	T	T
UC_Pep_Genomic_3976573	T	T
UC_Pep_Genomic_3976735	T	T
UC_Pep_Genomic_3977637	C	T
UC_Pep_Genomic_3978032	T	T
UC_Pep_Genomic_3978384	C	T
UC_Pep_Genomic_3979042	T	T
UC_Pep_Genomic_3980228	T	T
UC_Pep_Genomic_3980428	T	T
UC_Pep_Genomic_3980558	C	T
UC_Pep_Genomic_3980868	T	T
UC_Pep_Genomic_3980927	T	T
UC_Pep_Genomic_3981001	T	T
UC_Pep_Genomic_3981003	C	T
UC_Pep_Genomic_3981170	C	T
UC_Pep_Genomic_3981219	T	T
UC_Pep_Genomic_3981324	T	T
UC_Pep_Genomic_3981546	C	T
UC_Pep_Genomic_3982111	T	T
UC_Pep_Genomic_3982255	T	T
UC_Pep_Genomic_3982273	T	T
UC_Pep_Genomic_3984850	T	T
UC_Pep_Genomic_3984994	T	T
UC_Pep_Genomic_3985712	T	T
UC_Pep_Genomic_3985758	T	T
UC_Pep_Genomic_3986383	T	T
UC_Pep_Genomic_3987124	T	T
UC_Pep_Genomic_3987328	T	T
UC_Pep_Genomic_3987619	T	T
UC_Pep_Genomic_3987859	T	T
UC_Pep_Genomic_3988113	T	T
UC_Pep_Genomic_3988661	C	T
UC_Pep_Genomic_3988667	C	T
UC_Pep_Genomic_3989584	T	T
UC_Pep_Genomic_3989864	T	T
UC_Pep_Genomic_3990093	C	T
UC_Pep_Genomic_3992808	T	T
UC_Pep_Genomic_3992927	T	T
UC_Pep_Genomic_3993230	T	T
UC_Pep_Genomic_3993599	T	T
UC_Pep_Genomic_3993760	T	T
UC_Pep_Genomic_3993870	T	T
UC_Pep_Genomic_3995508	C	T
UC_Pep_Genomic_3995929	T	T
UC_Pep_Genomic_3995930	T	T
UC_Pep_Genomic_3995971	T	T
UC_Pep_Genomic_3995988	C	T
UC_Pep_Genomic_3996193	T	T
UC_Pep_Genomic_3996612	C	T
UC_Pep_Genomic_3997808	T	T
UC_Pep_Genomic_3997915	T	T
UC_Pep_Genomic_3998017	T	T
UC_Pep_Genomic_3998018	T	T
UC_Pep_Genomic_3998045	T	T
UC_Pep_Genomic_3998162	T	T
UC_Pep_Genomic_3998556	T	T
UC_Pep_Genomic_3998704	T	T
UC_Pep_Genomic_3998914	T	T
UC_Pep_Genomic_3999155	T	T
UC_Pep_Genomic_3999543	T	T
UC_Pep_Genomic_4000784	T	T
UC_Pep_Genomic_4000797	T	T
UC_Pep_Genomic_4001571	T	T
UC_Pep_Genomic_4001693	T	T
UC_Pep_Genomic_4001776	T	T
UC_Pep_Genomic_4001881	T	T
UC_Pep_Genomic_4001942	T	T
UC_Pep_Genomic_4003694	T	T
UC_Pep_Genomic_4003826	T	T
UC_Pep_Genomic_4003854	T	T
UC_Pep_Genomic_4004406	T	T
UC_Pep_Genomic_4004588	T	T
UC_Pep_Genomic_4005490	T	T
UC_Pep_Genomic_4006437	T	T
UC_Pep_Genomic_4007170	T	T
UC_Pep_Genomic_4007536	T	T
UC_Pep_Genomic_4008649	T	T
UC_Pep_Genomic_4010078	T	T
UC_Pep_Genomic_4011247	T	T
UC_Pep_Genomic_4012697	T	T
UC_Pep_Genomic_4013059	T	T
UC_Pep_Genomic_4013884	C	T
UC_Pep_Genomic_4014758	C	T
UC_Pep_Genomic_4014930	G	T
UC_Pep_Genomic_4016337	G	T
UC_Pep_Genomic_4018201	C	T
UC_Pep_Genomic_4018567	T	T
UC_Pep_Genomic_4018584	C	T
UC_Pep_Genomic_4018814	T	T
UC_Pep_Genomic_4020394	T	T
UC_Pep_Genomic_4021786	C	T
UC_Pep_Genomic_4027728	T	T
UC_Pep_Genomic_4027768	G	T
UC_Pep_Genomic_4027958	T	T
UC_Pep_Genomic_4029082	T	T
UC_Pep_Genomic_4032244	G	T
UC_Pep_Genomic_4035821	C	T
UC_Pep_Genomic_4051341	G	T
UC_Pep_Genomic_4054170	T	T
UC_Pep_Genomic_4055146	C	T
UC_Pep_Genomic_4055709	T	T
UC_Pep_Genomic_4074059	T	T
UC_Pep_Genomic_4074714	C	T
UC_Pep_Genomic_4084068	T	T
UC_Pep_Genomic_4087372	T	T
UC_Pep_Genomic_4088252	T	T
UC_Pep_Genomic_4091210	C	T
UC_Pep_Genomic_4094117	T	T
UC_Pep_Genomic_4094120	T	T
UC_Pep_Genomic_4095475	T	T
UC_Pep_Genomic_4098117	T	T
UC_Pep_Genomic_4111020	T	T
UC_Pep_Genomic_4115500	T	T
UC_Pep_Genomic_4116839	T	T
UC_Pep_Genomic_4118844	G	T
UC_Pep_Genomic_4121522	T	T
UC_Pep_Genomic_4121528	T	T
UC_Pep_Genomic_4127035	T	T
UC_Pep_Genomic_415385	T	T
UC_Pep_Genomic_4176829	T	T
UC_Pep_Genomic_4177040	T	T
UC_Pep_Genomic_4181190	C	T
UC_Pep_Genomic_4191479	T	T
UC_Pep_Genomic_4191660	T	T
UC_Pep_Genomic_419799	failed	T
UC_Pep_Genomic_4199742	T	T
UC_Pep_Genomic_4212082	T	T
UC_Pep_Genomic_4216097	G	T
UC_Pep_Genomic_4229586	T	T
UC_Pep_Genomic_4249517	T	T
UC_Pep_Genomic_4255752	C	T
UC_Pep_Genomic_4260020	G	T
UC_Pep_Genomic_4300150	C	T
UC_Pep_Genomic_4332405	T	T
UC_Pep_Genomic_4336983	C	T
UC_Pep_Genomic_4344054	T	T
UC_Pep_Genomic_4345377	C	T
UC_Pep_Genomic_4349402	T	T
UC_Pep_Genomic_436631	T	T
UC_Pep_Genomic_4397301	C	T
UC_Pep_Genomic_4411537	T	T
UC_Pep_Genomic_4421281	C	T
UC_Pep_Genomic_4428657	C	T
UC_Pep_Genomic_4435659	G	T
UC_Pep_Genomic_4462237	C	T
UC_Pep_Genomic_4462250	C	T
UC_Pep_Genomic_4464545	G	T
UC_Pep_Genomic_4470957	G	T
UC_Pep_Genomic_4487689	T	T
UC_Pep_Genomic_4493465	C	T
UC_Pep_Genomic_4494484	C	T
UC_Pep_Genomic_4498655	C	T
UC_Pep_Genomic_454748	G	T
UC_Pep_Genomic_456211	T	T
UC_Pep_Genomic_456501	T	T
UC_Pep_Genomic_457442	T	T
UC_Pep_Genomic_4582512	C	T
UC_Pep_Genomic_4582527	C	T
UC_Pep_Genomic_459573	C	T
UC_Pep_Genomic_4596308	G	T
UC_Pep_Genomic_460044	G	T
UC_Pep_Genomic_460288	T	T
UC_Pep_Genomic_460664	T	T
UC_Pep_Genomic_4614337	C	T
UC_Pep_Genomic_4614381	T	T
UC_Pep_Genomic_461460	T	T
UC_Pep_Genomic_461566	T	T
UC_Pep_Genomic_462058	T	T
UC_Pep_Genomic_462082	T	T
UC_Pep_Genomic_463008	G	T
UC_Pep_Genomic_463782	T	T
UC_Pep_Genomic_463842	T	T
UC_Pep_Genomic_463984	T	T
UC_Pep_Genomic_4666978	C	T
UC_Pep_Genomic_4677465	C	T
UC_Pep_Genomic_4679708	C	T
UC_Pep_Genomic_4687220	C	T
UC_Pep_Genomic_469132	T	T
UC_Pep_Genomic_469658	C	T
UC_Pep_Genomic_4696677	C	T
UC_Pep_Genomic_4696731	T	T
UC_Pep_Genomic_4706509	C	T
UC_Pep_Genomic_4707756	C	T
UC_Pep_Genomic_471731	C	T
UC_Pep_Genomic_472448	T	T
UC_Pep_Genomic_474707	C	T
UC_Pep_Genomic_4747562	C	T
UC_Pep_Genomic_4759408	C	T
UC_Pep_Genomic_4759908	T	T
UC_Pep_Genomic_476245	C	T
UC_Pep_Genomic_4765905	C	T
UC_Pep_Genomic_4780866	C	T
UC_Pep_Genomic_4782805	C	T
UC_Pep_Genomic_4792964	G	T
UC_Pep_Genomic_4796393	C	T
UC_Pep_Genomic_4807873	G	T
UC_Pep_Genomic_4832833	T	T
UC_Pep_Genomic_4834331	T	T
UC_Pep_Genomic_4850242	C	T
UC_Pep_Genomic_485208	T	T
UC_Pep_Genomic_485579	T	T
UC_Pep_Genomic_4857315	C	T
UC_Pep_Genomic_486504	T	T
UC_Pep_Genomic_4865545	C	T
UC_Pep_Genomic_486850	G	T
UC_Pep_Genomic_487046	T	T
UC_Pep_Genomic_487163	C	T
UC_Pep_Genomic_4883069	C	T
UC_Pep_Genomic_4886748	C	T
UC_Pep_Genomic_488680	C	T
UC_Pep_Genomic_489083	C	T
UC_Pep_Genomic_489140	C	T
UC_Pep_Genomic_4900041	G	T
UC_Pep_Genomic_493012	C	T
UC_Pep_Genomic_494113	C	T
UC_Pep_Genomic_494518	C	T
UC_Pep_Genomic_494572	T	T
UC_Pep_Genomic_4952250	C	T
UC_Pep_Genomic_4952261	C	T
UC_Pep_Genomic_4958311	C	T
UC_Pep_Genomic_4967693	C	T
UC_Pep_Genomic_4972953	C	T
UC_Pep_Genomic_4977259	G	T
UC_Pep_Genomic_4977260	C	T
UC_Pep_Genomic_498585	C	T
UC_Pep_Genomic_498595	G	T
UC_Pep_Genomic_499359	C	T
UC_Pep_Genomic_4994270	C	T
UC_Pep_Genomic_5002405	T	T
UC_Pep_Genomic_5002409	T	T
UC_Pep_Genomic_5003236	T	T
UC_Pep_Genomic_5004243	T	T
UC_Pep_Genomic_5006805	T	T
UC_Pep_Genomic_5006807	T	T
UC_Pep_Genomic_5015579	T	T
UC_Pep_Genomic_5017791	T	T
UC_Pep_Genomic_5020672	C	T
UC_Pep_Genomic_5023733	C	T
UC_Pep_Genomic_5025317	T	T
UC_Pep_Genomic_5030171	T	T
UC_Pep_Genomic_5031266	T	T
UC_Pep_Genomic_504112	C	T
UC_Pep_Genomic_504114	C	T
UC_Pep_Genomic_5041144	T	T
UC_Pep_Genomic_5041525	T	T
UC_Pep_Genomic_504268	C	T
UC_Pep_Genomic_5054307	G	T
UC_Pep_Genomic_5054854	T	T
UC_Pep_Genomic_506314	G	T
UC_Pep_Genomic_5066823	C	T
UC_Pep_Genomic_506742	T	T
UC_Pep_Genomic_5077850	T	T
UC_Pep_Genomic_5078938	G	T
UC_Pep_Genomic_5079713	T	T
UC_Pep_Genomic_5079914	G	T
UC_Pep_Genomic_5081115	T	T
UC_Pep_Genomic_508321	T	T
UC_Pep_Genomic_5085250	T	T
UC_Pep_Genomic_5087465	C	T
UC_Pep_Genomic_5095820	T	T
UC_Pep_Genomic_5095973	T	T
UC_Pep_Genomic_5096205	C	T
UC_Pep_Genomic_5096439	G	T
UC_Pep_Genomic_5098403	G	T
UC_Pep_Genomic_5099655	T	T
UC_Pep_Genomic_5104088	G	T
UC_Pep_Genomic_5105888	G	T
UC_Pep_Genomic_5105974	C	T
UC_Pep_Genomic_5106004	T	T
UC_Pep_Genomic_5107178	T	T
UC_Pep_Genomic_5108032	T	T
UC_Pep_Genomic_5108039	T	T
UC_Pep_Genomic_5108276	T	T
UC_Pep_Genomic_5109392	T	T
UC_Pep_Genomic_5109533	C	T
UC_Pep_Genomic_5111226	G	T
UC_Pep_Genomic_5112815	failed	T
UC_Pep_Genomic_5113055	G	T
UC_Pep_Genomic_5113380	T	T
UC_Pep_Genomic_5113890	C	T
UC_Pep_Genomic_5114159	C	T
UC_Pep_Genomic_5114478	T	T
UC_Pep_Genomic_5114528	C	T
UC_Pep_Genomic_5115640	C	T
UC_Pep_Genomic_5115868	G	T
UC_Pep_Genomic_5115961	G	T
UC_Pep_Genomic_5116429	T	T
UC_Pep_Genomic_5116509	C	T
UC_Pep_Genomic_5116590	T	T
UC_Pep_Genomic_5116811	C	T
UC_Pep_Genomic_5117071	T	T
UC_Pep_Genomic_5117308	G	T
UC_Pep_Genomic_5117445	T	T
UC_Pep_Genomic_5117743	T	T
UC_Pep_Genomic_5119373	T	T
UC_Pep_Genomic_5119561	C	T
UC_Pep_Genomic_5121099	T	T
UC_Pep_Genomic_5121146	T	T
UC_Pep_Genomic_5121758	T	T
UC_Pep_Genomic_5121834	T	T
UC_Pep_Genomic_5121872	T	T
UC_Pep_Genomic_5121972	G	T
UC_Pep_Genomic_5123789	T	T
UC_Pep_Genomic_5124260	T	T
UC_Pep_Genomic_5124267	T	T
UC_Pep_Genomic_5124337	T	T
UC_Pep_Genomic_5124413	T	T
UC_Pep_Genomic_5124639	T	T
UC_Pep_Genomic_5124659	T	T
UC_Pep_Genomic_5124827	T	T
UC_Pep_Genomic_5127674	T	T
UC_Pep_Genomic_5128440	T	T
UC_Pep_Genomic_5128441	T	T
UC_Pep_Genomic_5128466	T	T
UC_Pep_Genomic_5133603	T	T
UC_Pep_Genomic_5135145	T	T
UC_Pep_Genomic_5136038	T	T
UC_Pep_Genomic_5138718	T	T
UC_Pep_Genomic_5144896	C	T
UC_Pep_Genomic_5144981	T	T
UC_Pep_Genomic_5145003	T	T
UC_Pep_Genomic_5145048	C	T
UC_Pep_Genomic_5145064	C	T
UC_Pep_Genomic_5145585	T	T
UC_Pep_Genomic_5145597	G	T
UC_Pep_Genomic_5146748	C	T
UC_Pep_Genomic_5148429	C	T
UC_Pep_Genomic_515285	T	T
UC_Pep_Genomic_5156598	T	T
UC_Pep_Genomic_5157949	T	T
UC_Pep_Genomic_515969	C	T
UC_Pep_Genomic_5160007	C	T
UC_Pep_Genomic_5161106	C	T
UC_Pep_Genomic_5161577	C	T
UC_Pep_Genomic_5164267	G	T
UC_Pep_Genomic_5173938	C	T
UC_Pep_Genomic_5174864	T	T
UC_Pep_Genomic_5176852	T	T
UC_Pep_Genomic_5178188	T	T
UC_Pep_Genomic_5190695	T	T
UC_Pep_Genomic_519640	T	T
UC_Pep_Genomic_5202528	T	T
UC_Pep_Genomic_5208933	T	T
UC_Pep_Genomic_5208934	T	T
UC_Pep_Genomic_5209177	G	T
UC_Pep_Genomic_5211104	C	T
UC_Pep_Genomic_5211948	C	T
UC_Pep_Genomic_5212860	G	T
UC_Pep_Genomic_5220750	C	T
UC_Pep_Genomic_5222864	T	T
UC_Pep_Genomic_5226277	T	T
UC_Pep_Genomic_523490	T	T
UC_Pep_Genomic_5242901	C	T
UC_Pep_Genomic_5246848	C	T
UC_Pep_Genomic_5259545	G	T
UC_Pep_Genomic_5262390	T	T
UC_Pep_Genomic_527856	T	T
UC_Pep_Genomic_5282247	T	T
UC_Pep_Genomic_5289930	G	T
UC_Pep_Genomic_5292806	T	T
UC_Pep_Genomic_5302871	T	T
UC_Pep_Genomic_5303069	T	T
UC_Pep_Genomic_5306318	T	T
UC_Pep_Genomic_5307150	T	T
UC_Pep_Genomic_5307232	T	T
UC_Pep_Genomic_5316119	T	T
UC_Pep_Genomic_531646	T	T
UC_Pep_Genomic_5318148	T	T
UC_Pep_Genomic_5344975	T	T
UC_Pep_Genomic_5345171	T	T
UC_Pep_Genomic_5345953	T	T
UC_Pep_Genomic_5346796	T	T
UC_Pep_Genomic_5357961	T	T
UC_Pep_Genomic_5361820	T	T
UC_Pep_Genomic_5370076	T	T
UC_Pep_Genomic_5375671	G	T
UC_Pep_Genomic_5377496	T	T
UC_Pep_Genomic_5378922	T	T
UC_Pep_Genomic_5379104	T	T
UC_Pep_Genomic_5380866	T	T
UC_Pep_Genomic_5383256	T	T
UC_Pep_Genomic_5383265	T	T
UC_Pep_Genomic_5385354	T	T
UC_Pep_Genomic_5386561	T	T
UC_Pep_Genomic_5408349	T	T
UC_Pep_Genomic_5411283	T	T
UC_Pep_Genomic_5412460	C	T
UC_Pep_Genomic_5414020	T	T
UC_Pep_Genomic_5418391	T	T
UC_Pep_Genomic_5418446	T	T
UC_Pep_Genomic_5426811	G	T
UC_Pep_Genomic_5430428	T	T
UC_Pep_Genomic_5433902	T	T
UC_Pep_Genomic_5438840	T	T
UC_Pep_Genomic_5443485	T	T
UC_Pep_Genomic_5443489	T	T
UC_Pep_Genomic_5451371	C	T
UC_Pep_Genomic_5462202	C	T
UC_Pep_Genomic_5468594	T	T
UC_Pep_Genomic_5470507	T	T
UC_Pep_Genomic_5472514	G	T
UC_Pep_Genomic_5475653	T	T
UC_Pep_Genomic_5481151	T	T
UC_Pep_Genomic_5494240	T	T
UC_Pep_Genomic_5495345	T	T
UC_Pep_Genomic_5498522	C	T
[truncated: 14,406 more rows]

## Sheet: summary
Genotype	HDA149	HDA330
A	3385	3368
C	3732	3734
T	3636	3577
G	3972	3931
Homozygous	14725	14610
Percent homozygous	99.6683	99.4825
K	8	15
M	4	16
R	24	28
Y	13	17
Heterozygous	49	76
Percent heterozygous	0.00331664	0.005175
failed	1631	1719
