# Supplementary material for: Representing true plant genomes: haplotype-resolved hybrid pepper genome with trio-binning
Source: Front Plant Sci. 2023 Nov 16;14:1184112. doi: 10.3389/fpls.2023.1184112 (PMC10687446; doi:10.3389/fpls.2023.1184112)
Supplement: Supplementary Data Sheet 2 — Detailed assembly statistics. [file DataSheet_2.xlsx]

## Sheet: Assembly Software Statistics
Haplotype	TrioCanu HDA149	TrioCanu HDA330	Hifiasm HDA149	Hifiasm HDA330
Binning method	Canu	Canu	Yak	Yak
Assembly method	Canu	Canu	Hifiasm	Hifiasm
Main genome scaffold total	5879	5914	364	119
Main genome contig total:	5879	5914	364	119
Main genome scaffold sequence total:	3306.08	3297.9	3100.1	3088.69
Main genome contig sequence total:	3306.08	3297.9	3100.1	3088.69
Gap	0	0	0	0
Main genome scaffold L50:	16	12	7	7
Main genome scaffold N50:	66.526	86.496	228.056	177.885
Main genome contig L50:	16	12	7	7
Main genome contig N50:	66.526	86.496	228.056	177.885
Main genome scaffold L90:	26	19	10	10
Main genome scaffold N90:	40.427	57.044	131.907	167.117
Main genome contig L90:	26	19	10	10
Main genome contig N90:	40.427	57.044	131.907	131.907
Max scaffold length:	211.378	254.686	263.427	270.729
Max contig length:	211.378	254.686	263.427	270.729
Number of scaffolds > 50 KB:	837	791	156	94
% main genome in scaffolds > 50 KB:	0.9499	0.9483	0.998	0.9997
GC	0.35	0.3498	0.3498	0.3496
Number of contigs > 50 MB	19	22	15	16
Total contig length for those > 50 MB	1851209860	2331169264	2682590210	2781520249
Number of scaffolds > 100 MB	7	9	12	12
Total scaffold length for those > 100 MB	1002935371	1394716985	2432475464	2454919298
Number of scaffolds > 250 MB	0	1	3	2
Total scaffold length for those > 250 MB	0	254685959	768703732	523011328
%Estimated Genome size	94.4594	94.2257	88.5744	88.2483

## Sheet: Scaffolding Statistics
Working Assembly name	Bionano-TrioCanu HDA149 hybrid scaffolds	TrioCanu HDA149	TrioCanu_HDA149_B1	TrioCanu_HDA149_B2	TrioCanu_HDA149_B3	TrioCanu_HDA149_B4	TrioCanu_HDA149_B5		Bionano-Hifiasm HDA149 hybrid scaffolds	Hifiasm HDA149	Hifiasm_HDA149_B1	Hifiasm_HDA149_B2	Hifiasm_HDA149_B3	Hifiasm_HDA149_B4	Hifiasm_HDA149_B5		Bionano-TrioCanu HDA330 hybrid scaffolds	TrioCanu HDA330	TrioCanu_HDA330_B1	TrioCanu_HDA330_B2	TrioCanu_HDA330_B3	TrioCanu_HDA330_B4	TrioCanu_HDA330_B5		Bionano-Hifiasm HDA330 hybrid scaffolds	Hifiasm HDA330	Hifiasm_HDA330_B1	Hifiasm_HDA330_B2	Hifiasm_HDA330_B3	Hifiasm_HDA330_B4	Hifiasm_HDA330_B5
Final assembly name							HDA149alt_v1.0								HDA149v1.0								HDA330alt_v1.0								HDA330v1.0
Scaffolding step	Step 0: Bionano-contig level assembly hybrid scaffolds	HiCanu Contigs	Step 1: Homology based scaffolding to Hifiasm HDA149	Step 2: Homology based gap filling using Hifiasm HDA149	Step 3: Homology based scaffolding to TrioCanu HDA330 B2	Step 4: Homology based scaffolding to Bionano-TrioCanu HDA149 hybrid scaffolds	Step 5: Homology based scaffolding to Dempsey v1.0		Step 0: Bionano-contig level assembly hybrid scaffolds	Hifiasm Contigs	Step 1: Homology based scaffolding to TrioCanu HDA149	Step 2: Homology based gap filling using TrioCanu HDA149	Step 3: Homology based scaffolding to Hifiasm HDA330 B2	Step 4: Homology based scaffolding to Bionano-Hifiasm HDA149 hybrid scaffolds	Step 5: Homology based scaffolding to Dempsey v1.0		Step 0: Bionano	HiCanu Contigs	Step 1: Homology based scaffolding using Hifiasm HDA330	Step 2: Homology based gap filling using Hifiasm HDA330	Step 3: Homology based scaffolding to TrioCanu HDA149 B2	Step 4: Homology based scaffolding to Bionano-TrioCanu HDA330 hybrid scaffolds	Step 5: Homology based scaffolding to Dempsey v1.0		Step 0: Bionano	Hifiasm contigs	Step 1: Homology based scaffolding to TrioCanu HDA330	Step 2: Homology based gap filling using TrioCanu HDA330	Step 3: Homology based scaffolding to Hifiasm HDA149 B2	Step 4: Homology based scaffolding to Bionano-Hifiasm HDA330 hybrid scaffolds	Step 5: Homology based scaffolding to Dempsey v1.0
Binning method	TrioCanu	Canu	TrioCanu	TrioCanu	TrioCanu	TrioCanu	TrioCanu		yak	yak	yak	yak	yak	yak	yak		TrioCanu	TrioCanu	TrioCanu	TrioCanu	TrioCanu	TrioCanu	TrioCanu		yak	yak	yak	yak	yak	yak	yak
Assembly method	HiCanu	Canu	HiCanu	HiCanu	HiCanu	HiCanu	HiCanu		Hifiasm	Hifiasm	Hifiasm	Hifiasm	Hifiasm	Hifiasm	Hifiasm		HiCanu	HiCanu	HiCanu	HiCanu	HiCanu	HiCanu	HiCanu		Hifiasm	Hifiasm	Hifiasm	Hifiasm	Hifiasm	Hifiasm	Hifiasm
Scaffoling method	Bionano	None	Ragtag	Ragtag	Ragtag	Ragtag	Ragtag		Bionano	None	Ragtag	Ragtag	Ragtag	Ragtag	Ragtag		Bionano	None	Ragtag	Ragtag	Ragtag	Ragtag	Ragtag		Bionano	None	Ragtag	Ragtag	Ragtag	Ragtag	Ragtag
Main genome scaffold total	56	5879	3319	3317	1247	743	448		48	364	327	325	282	268	239		53	5914	3531	3530	1285	663	349		48	119	99	97	83	71	51
Main genome contig total:	20526	5879	5879	5864	5864	5864	5864		2703	364	364	359	359	359	359		52859	5914	5914	5905	5905	5905	5905		44105	119	119	112	112	112	112
Main genome scaffold sequence total:	3160.47	3306.08	3306.34	3306.07	3306.28	3306.33	3306.36		3087.58	3100.1	3100.11	3100.64	3100.64	3100.64	3100.64		3183.43	3297.9	3298.14	3297.96	3298.18	3298.24	3298.28		3180.31	3088.69	3088.69	3088.62	3088.62	3088.62	3088.63
Main genome contig sequence total:	3075.2	3306.08	3306.08	3305.82	3305.82	3305.82	3305.82		3073.16	0	3100.1	3100.63	3100.63	3100.63	3100.63		2970.87	3297.9	3297.9	3297.72	3297.72	3297.72	3297.72		2998.57	3088.69	3088.69	3088.62	3088.62	3088.62	3088.62
Gap	0.02698	0	8e-05	8e-05	0.00014	0.00015	0.00016		0.00467	0	0	0	0	0	0		6.677	0	7e-05	7e-05	0.00014	0.00016	0.00017		0.05715	0	0	0	0	0	0
Main genome scaffold L50:	7	16	7	7	6	6	6		7	7	7	7	6	6	6		7	12	7	7	6	6	6		7	7	6	6	6	6	6
Main genome scaffold N50:	210.888	66.526	231.141	231.141	263.758	268.709	281.315		182.642	228.056	228.056	228.056	249.322	254.996	265.976		196.755	86.496	232.113	232.113	262.441	265.875	276.268		198.845	177.885	247.431	247.431	247.48	254.136	263.072
Main genome contig L50:	23	16	16	14	14	14	14		9	7	7	7	7	7	7		21	12	12	12	12	12	12		17	7	7	7	7	7	7
Main genome contig N50:	37.701	66.526	66.526	75.138	75.138	75.138	75.138		99.574	228.056	228.056	228.056	228.056	228.056	228.056		42.147	86.496	86.496	86.496	86.496	86.496	86.496		62.381	177.885	177.885	228.564	228.564	228.564	228.564
Main genome scaffold L90:	10	26	10	10	8	8	8		10	10	10	10	9	8	8		10	19	9	9	8	8	8		10	10	9	9	9	8	8
Main genome scaffold N90:	178.235	40.427	134.473	134.473	243.765	266.361	269.053		168.111	131.907	131.907	131.907	189.871	249.44	253.986		173.495	57.044	178.087	178.089	237.788	263.021	268.741		153.535	167.117	177.885	177.885	189.92	247.92	254.59
Main genome contig L90:	45	26	26	22	22	22	22		20	10	10	10	10	10	10		44	19	19	18	18	18	18		25	10	10	10	10	10	10
Main genome contig N90:	21.719	40.427	40.427	48.277	48.277	48.277	48.277		36.815	131.907	131.907	131.907	131.907	131.907	131.907		19.619	57.044	57.044	58.735	58.735	58.735	58.735		36.164	131.907	167.117	171.419	171.419	171.419	171.419
Max scaffold length:	258.855	211.378	274.929	274.929	334.144	352.291	358.933		278.76	263.427	263.512	263.512	330.472	330.472	336.105		291.792	254.686	280.745	280.745	351.515	354.483	361.462		279.211	270.729	331.777	331.777	331.777	332.599	338.608
Max contig length:	133.611	211.378	211.378	221.089	221.089	221.089	221.089		231.208	263.427	263.427	263.427	263.427	263.427	263.427		176.82	254.686	254.686	254.686	254.686	254.686	254.686		227.648	270.729	270.729	270.729	270.729	270.729	270.729
Number of scaffolds > 50 KB:	56	837	487	485	187	144	89		48	156	133	131	103	91	76		53	791	498	497	171	101	54		48	94	76	74	63	52	38
% main genome in scaffolds > 50 KB:	1	0.9499	0.9718	0.9718	0.9898	0.9943	0.9967		1	0.998	0.9982	0.9982	0.9984	0.9984	0.9985		100	0.9483	0.9694	0.9694	0.9893	0.9949	0.9975		1	0.9997	0.9998	0.9998	0.9998	0.9998	0.9999
GC	0.3493	0.35	0.35	0.35	0.35	0.35	0.35		0.3492	0.3498	0.3498	0.3499	0.3499	0.3499	0.3499		0.3491	0.3498	0.3498	0.3498	0.3498	0.3498	0.3498		0.349	0.3496	0.3496	0.3496	0.3496	0.3496	0.3496
Number of scaffolds > 50 MB	17	19	17	17	16	13	12		17	15	17	18	15	13	12		18	22	17	17	16	14	12		17	16	15	15	15	14	12
Total scaffold length for those > 250 MB	2864701380	1851209860	2905310351	2905392282	3133828362	3190442393	3288634552		2853659208	2682590210	2826413292	2885686645	2948394989	2996917282	3087642773		2911576746	2331169264	2990020154	2989967461	3139431559	3208645892	3282149462		2894857277	2781520249	2865511241	2880441818	2942723424	3009127741	3083058867
Number of scaffolds > 100 MB	12	7	13	13	13	12	12		13	12	12	12	12	12	12		11	9	13	13	12	11	12		13	12	11	11	12	11	12
Total scaffold length for those > 250 MB	2516909934	1002935371	2573768338	2573828669	2935846299	3123179623	3288634552		2613318242	2432475464	2432914326	2432914326	2712053608	2938782016	3087642773		2419694342	1394716985	2700283476	2700230783	2840588065	2950654738	3282149462		2571254353	2454919298	2542949901	2557879702	2702197475	2768475671	3083058867
Number of scaffolds > 250 MB	2	0	4	4	7	9	10		2	3	3	3	5	7	9		4	1	4	4	7	9	10		3	2	4	5	5	7	9
Total scaffold length for those > 250 MB	511272471	0	1044672233	1044753033	1947470789	2551505495	2911362097		531209190	768703732	768852402	768852402	1383341270	1912458650	2482811035		1081994230	254685959	1050799885	1050799885	1960200927	2566153677	2900380215		787297097	523011328	1109617795	1372267866	1372752258	1921456242	2481194129
Number of Bionano cuts made	47	NA	NA	NA	NA	NA	NA		26	NA	NA	NA	NA	NA	NA		44	NA	NA	NA	NA	NA	NA		28	NA	NA	NA	NA	NA	NA
%Estimated Genome size	87.8628	94.4594	94.4594	94.4519	94.4519	94.4519	94.4519		87.8045	88.5744	88.5744	88.5895	88.5895	88.5895	88.5895		84.8821	94.2257	94.2257	94.2206	94.2206	94.2206	94.2206		85.6733	88.2483	88.2483	88.2463	88.2463	88.2463	88.2463

## Sheet: Previously Published Genomes St
Sample name	UCD10x v1.0	Dempsey v1.0	Zhangshugang v1.0	HDA149v1.0 (Hifiasm)	HDA330v1.0 (Hifiasm)	HDA149alt_v1.0 (TrioCanu)	HDA330alt_v1.0 (TrioCanu)
Main genome scaffold total:	81378	121	91	239	51	448	349
Main genome contig total:	134101	532	601	359	112	5864	5905
Main genome scaffold sequence total:	3212.12	3053.54	3023.86	3100.64	3088.63	3306.36	3298.28
Main genome contig sequence total:	3124.32	3035.49	3023.61	3100.63	3088.62	3305.82	3297.72
Gap %	2.733	0.591	0.008	0	0	0.00016	0.00017
Gap #	52723	411	510	110	57	5416	5556
Main genome scaffold N50:	7	6	6	6	6	6	6
Main genome scaffold L50:	227.195	260.587	259.736	265.976	263.072	281.315	276.268
Main genome contig N50:	6631	51	25	7	7	14	12
Main genome contig L50:	0.122785	18.332	35.415	228.056	228.564	75.138	86.496
Main genome scaffold N90:	10	8	8	8	8	8	8
Main genome scaffold L90:	219.064	249.534	253.234	253.986	254.59	269.053	268.741
Main genome contig N90:	13035	98	49	10	10	22	18
Main genome contig L90:	0.067656	9.708	19.431	131.907	171.419	48.277	58.735
Max scaffold length (Mbp)	270.589	334.503	332.615	336.105	338.608	358.933	361.462
Max contig length (Mbp)	1.726	84.846	159.109	263.427	270.729	221.089	254.686
Number of scaffolds > 50 KB:	1241	78	21	76	38	89	54
% main genome in scaffolds > 50 KB:	0.9237	0.9995	0.9998	0.9985	0.9999	0.9967	0.9975
GC	0.3491	0.349	0.3485	0.3499	0.3496	0.35	0.3498
Number of scaffolds > 50 MB	12	12	12	12	12	12	12
Total scaffold length for those > 50 MB	2672115314	3044206144	3021138580	3087642773	3083058867	3288634552	3282149462
Number of scaffolds > 100 MB	12	12	12	12	12	12	12
Total scaffold length for those > 100 MB	2672115314	3044206144	3021138580	3087642773	3083058867	3288634552	3282149462
Number of scaffolds > 250 MB	2	7	8	9	9	10	10
Total scaffold length for those > 250 MB	526191585	1956159201	2210228084	2482811035	2481194129	2911362097	2900380215
% Estimated Genome size	0.892662	0.867214	0.863887	0.885895	0.882463	0.944519	0.942206
chr1 (bp)	255602192	334502894	332615375	336104851	338608388	358933134	361462380
chr2 (bp)	154330250	176530990	177319215	178420527	178248385	191568309	194028868
chr3 (bp)	270589393	290863311	289790774	289080703	293695582	309224740	311122511
chr4 (bp)	231497844	247785150	248932513	255044414	254336741	268244470	266365528
chr5 (bp)	221136838	251346832	254874144	253985496	254590352	269454441	270254690
chr6 (bp)	228254876	249534412	253233553	253060049	252855154	267078952	264368739
chr7 (bp)	227195441	265581551	266382521	271120995	270757221	283384106	292309436
chr8 (bp)	173776113	173976258	174326481	176971069	175438624	185704146	187740379
chr9 (bp)	219064469	272473411	278410012	283824095	274638727	299022473	290736781
chr10 (bp)	221721387	240220133	210332287	249440142	248177729	269053121	268740827
chr11 (bp)	235950708	280804108	275185330	274614127	278639650	305651380	298750946
chr12 (bp)	232995803	260587094	259736375	265976305	263072314	281315280	276268377
bp in chromosomes	2672115314	3044206144	3021138580	3087642773	3083058867	3288634552	3281898322
total bp of assembly	3212117706	3053539685	3023861000	3100645000	3088626000	3306359000	3298272000
% of assembly in chromosomes	0.8319	0.997	0.9991	0.995807	0.998198	0.994639	0.995036
% of genome in chromosome assembly	0.763462	0.869773	0.863182	0.882184	0.880874	0.93961	0.937685
Complete BUSCOs (C)	0.965	0.977	0.971	0.974	0.984	0.985	0.985
